# Supplementary material for: Heterotrophy among Cyanobacteria
Source: PubMed Central journal article supplement (PMC10515406; doi:10.1021/acsomega.3c02205), 2023-09-06
Supplement: ao3c02205_si_001.pdf [file ao3c02205_si_001.pdf]

# Heterotrophy among cyanobacteria

## Supporting Information

*Ronald Stebegg<sup>1,\*</sup>, Georg Schmetterer<sup>1</sup>, and Annette Rompel<sup>1,\*</sup>*

<sup>1</sup>Universität Wien, Fakultät für Chemie, Institut für Biophysikalische Chemie, 1090 Wien, Austria.

[www.bpc.univie.ac.at](http://www.bpc.univie.ac.at)

\*Correspondence e-mail: [ronald.stebegg@univie.ac.at](mailto:ronald.stebegg@univie.ac.at); and [annette.rompel@univie.ac.at](mailto:annette.rompel@univie.ac.at)

Table S1: List of strains (ordered alphabetically) capable of photomixotrophic, photoheterotrophic and chemoheterotrophic growth, PM...photomixotrophic growth, PH...photoheterotrophic growth, LAHG...light activated heterotrophic growth, CH...chemoheterotrophic growth, + growth, ++ strong growth, - no growth (for PH, LAHG and CH) or no increase compared to autotrophic growth (for PM), +/- very weak growth (for PH, LAHG and CH) or very low stimulating effect (for PM), n. t. ... not tested, lx...lux, ftc...foot-candle, (P)...*gtr* on a self-replicating plasmid, (C)...*gtr* integrated into the chromosome of *Synechococcus* sp. PCC 7942.

| strain                                                      | substrate | medium<br>(the numbers in ( )<br>without initial S<br>refer to the main<br>manuscript) | temperature | illumination                                    | PM                                                            | PH              | LAHG  | CH                                       | references<br>(refers to<br>number in<br>main<br>manuscript) |
|-------------------------------------------------------------|-----------|----------------------------------------------------------------------------------------|-------------|-------------------------------------------------|---------------------------------------------------------------|-----------------|-------|------------------------------------------|--------------------------------------------------------------|
| <i>Anabaena</i> sp.                                         | fructose  | Kratz and Myers<br>medium (56) with<br>trace elements<br>(S1)                          | 24 +/-2 °C  | 2200 lx                                         | + (15 mM)                                                     | n. t.           | n. t. | + (15 mM)                                | 91                                                           |
|                                                             | lactose   | Kratz and Myers<br>medium (56) with<br>trace elements<br>(S1)                          | 24 +/-2 °C  | 2200 lx                                         | ++ (15 mM)                                                    | n. t.           | n. t. | ++ (15 mM)                               | 91                                                           |
|                                                             | acetate   | Kratz and Myers<br>medium (56) with<br>trace elements<br>(S1)                          | 24 +/-2 °C  | 2200 lx                                         | - (15 mM) (inhibitory)                                        | n. t.           | n. t. | + (15 mM) (only within first<br>12 days) | 91                                                           |
|                                                             | mannose   | Kratz and Myers<br>medium (56) with<br>trace elements<br>(S1)                          | 24 +/-2 °C  | 2200 lx                                         | - (15 mM) (inhibitory)                                        | n. t.           | n. t. | + (15 mM)                                | 91                                                           |
|                                                             | xylose    | Kratz and Myers<br>medium (56) with<br>trace elements<br>(S1)                          | 24 +/-2 °C  | 2200 lx                                         | - (15 mM) (very<br>inhibitory)                                | n. t.           | n. t. | - (15 mM)                                | 91                                                           |
| <i>Anabaena</i> sp. PCC 7120                                | fructose  | Allen and Arnon<br>medium (S2)                                                         | 30 °C       | 50 – 80 $\mu\text{E m}^{-2}$<br>$\text{s}^{-1}$ | - (5 mM)                                                      | n. t.           | n. t. | - (5 mM)                                 | 27                                                           |
|                                                             | fructose  | BG11 (23)                                                                              | 32 °C       | 10 $\mu\text{E m}^{-2}$ $\text{s}^{-1}$         | + (50 - 200 mM)                                               | + (50 - 200 mM) | n. t. | + (50 – 200 mM)                          | 96                                                           |
|                                                             | glucose   | BG11 (23)                                                                              | 30 °C       | 160 $\mu\text{E m}^{-2}$ $\text{s}^{-1}$        | + (33 – 133 mM)                                               | n. t.           | n. t. | n. t.                                    | 98                                                           |
|                                                             | glucose   | BG11 (23)                                                                              | 32 °C       | 10 $\mu\text{E m}^{-2}$ $\text{s}^{-1}$         | + (50 - 200 mM)                                               | - (10 – 200 mM) | n. t. | - (10 – 200 mM)                          | 96                                                           |
|                                                             | sucrose   | BG11 (23)                                                                              | 30 °C       | 60 $\mu\text{E m}^{-2}$ $\text{s}^{-1}$         | + (2.5 mM)                                                    | - (2.5 mM)      | n. t. | - (2.5 mM)                               | 99                                                           |
| <i>Anabaena</i> sp. PCC 7120<br><i>frtRABC</i> <sup>+</sup> | fructose  | Allen and Arnon<br>medium (S2)                                                         | 30 °C       | 50 – 80 $\mu\text{E m}^{-2}$<br>$\text{s}^{-1}$ | - (no effect at 1 – 5 mM,<br>slightly inhibiting at 50<br>mM) | + (5 mM)        | n. t. | + (5 – 50 mM)                            | 27                                                           |
| <i>Anabaena</i> sp. PCC 7120<br><i>frtABC</i> <sup>+</sup>  | fructose  | Allen and Arnon<br>medium (S2)                                                         | 30 °C       | 50 – 80 $\mu\text{E m}^{-2}$<br>$\text{s}^{-1}$ | toxic (1 mM)                                                  | n. t.           | n. t. | - (5 mM)                                 | 27                                                           |

|                                                                     |           |                                                   |             |                                             |                                    |                                    |       |                      |     |
|---------------------------------------------------------------------|-----------|---------------------------------------------------|-------------|---------------------------------------------|------------------------------------|------------------------------------|-------|----------------------|-----|
| <i>Anabaena</i> sp. PCC 7120<br><i>gtr</i> <sup>+</sup>             | fructose  | BG11 (23)                                         | 32 °C       | 10 $\mu\text{E m}^{-2} \text{s}^{-1}$       | + (50 – 100 mM),<br>toxic (200 mM) | + (10 - 100 mM),<br>toxic (200 mM) | n. t. | - (10 – 200 mM)      | 96  |
|                                                                     | glucose   | BG11 (23)                                         | 32 °C       | 10 $\mu\text{E m}^{-2} \text{s}^{-1}$       | toxic (5 mM or higher)             | toxic (5 mM or higher)             | n.t.  | n. t.                | 96  |
| <i>Anabaena</i> sp. PCC 7120<br><i>coxBAC1</i> <sup>-</sup>         | fructose  | BG11 (23)                                         | 32 °C       | 10 $\mu\text{E m}^{-2} \text{s}^{-1}$       | n. t.                              | n. t.                              | n. t. | - (50 – 200 mM)      | 96  |
| <i>Anabaena variabilis</i><br>ATCC 29413                            | fructose  | Allen and Arnon<br>medium (S2)                    | 30 °C       | 50 – 80 $\mu\text{E m}^{-2} \text{s}^{-1}$  | n. t.                              | n. t.                              | n. t. | + (5 mM)             | 93  |
|                                                                     | fructose  | Allen and Arnon<br>medium (S2)                    | 30 °C       | 50 – 80 $\mu\text{E m}^{-2} \text{s}^{-1}$  | + (5 – 50 mM)                      | n. t.                              | n. t. | + (5 – 50 mM)        | 27  |
| <i>Anabaena variabilis</i><br>ATCC 29413 <i>frR</i> <sup>-</sup>    | fructose  | Allen and Arnon<br>medium (S2)                    | 30 °C       | 50 – 80 $\mu\text{E m}^{-2} \text{s}^{-1}$  | toxic (5 – 200 mM)                 | n. t.                              | n. t. | - (5 mM)             | 27  |
| <i>Anabaena variabilis</i><br>ATCC 29413 <i>coxBAC</i> <sup>-</sup> | fructose  | BG11-0 (23)                                       | 30 °C       | not stated                                  | n. t.                              | n. t.                              | n. t. | - (20 mM)            | 95  |
| <i>Anabaenopsis circularis</i><br>( <i>Nostoc</i> sp. PCC 6720)     | glucose   | nitrogen-free<br>medium (102)                     | 32 °C       | no light used                               | n. t.                              | n. t.                              | n. t. | + (5.6 – 39 mM)      | 102 |
|                                                                     | glucose   | BG11-0 (23)                                       | 25 °C       | < 500 lx                                    | n. t.                              | + (17 – 28 mM)                     | n. t. | n. t.                | 23  |
|                                                                     | fructose  | nitrogen-free<br>medium (102)                     | 32 °C       | not stated (PM),<br>no light used<br>(CH)   | + (17 mM)                          | n. t.                              | n. t. | + (5.6 – 39 mM)      | 102 |
|                                                                     | fructose  | BG11-0 (23)                                       | 25 °C       | < 500 lx                                    | n. t.                              | + (17–28 mM)                       | n. t. | n. t.                | 23  |
|                                                                     | sucrose   | nitrogen-free<br>medium (102)                     | 32 °C       | no light used                               | n. t.                              | n. t.                              | n. t. | + (2.9 – 20 mM,)     | 102 |
|                                                                     | sucrose   | BG11-0 (23)                                       | 25 °C       | < 500 lx                                    | n. t.                              | - (9 – 15 mM,)                     | n. t. | n. t.                | 23  |
|                                                                     | maltose   | nitrogen-free<br>medium (102)                     | 32 °C       | no light used                               | n. t.                              | n. t.                              | n. t. | + (conc. not stated) | 102 |
|                                                                     | ribose    | BG11-0 (23)                                       | 25 °C       | < 500 lx                                    | n. t.                              | - (33 mM)                          | n. t. | n. t.                | 23  |
| <i>Arthospira platensis</i><br>(also <i>Spirulina platensis</i> )   | glucose   | medium according<br>to ref 82                     | 30 °C       | 80 – 160 $\mu\text{E m}^{-2} \text{s}^{-1}$ | + (11 mM)                          | n. t.                              | n. t. | n. t.                | 81  |
| <i>Calothrix marchica</i><br>Lemm. Var. <i>intermedia</i><br>Rao    | glucose   | Allen and Arnon's<br>nitrogen-free<br>medium (S2) | 24 +/- 2 °C | 2200 lx                                     | + (15 – 50 mM)                     | + (5 – 50 mM)                      | n. t. | + (15 – 50 mM)       | 104 |
|                                                                     | fructose  | Allen and Arnon's<br>nitrogen-free<br>medium (S2) | 24 +/- 2 °C | 2200 lx                                     | + (5 – 50 mM)                      | + (5 – 50 mM)                      | n. t. | + (5 – 50 mM)        | 104 |
|                                                                     | sucrose   | Allen and Arnon's<br>nitrogen-free<br>medium (S2) | 24 +/- 2 °C | 2200 lx                                     | + (7.5 – 50 mM)                    | + (5 – 50 mM)                      | n. t. | + (5 – 50 mM)        | 104 |
|                                                                     | galactose | Allen and Arnon's<br>nitrogen-free<br>medium (S2) | 24 +/- 2 °C | 2200 lx                                     | +/- (15 mM)                        | +/- (15 mM)                        | n. t. | +/- (15 mM)          | 104 |
|                                                                     | mannitol  | Allen and Arnon's<br>nitrogen-free<br>medium (S2) | 24 +/- 2 °C | 2200 lx                                     | +/- (15 mM)                        | +/- (15 mM)                        | n. t. | +/- (15 mM)          | 104 |
|                                                                     | sorbitol  | Allen and Arnon's<br>nitrogen-free<br>medium (S2) | 24 +/- 2 °C | 2200 lx                                     | +/- (15 mM)                        | +/- (15 mM)                        | n. t. | +/- (15 mM)          | 104 |

|                                                                |                |                                                                                             |       |          |       |                    |       |                                                                                 |     |
|----------------------------------------------------------------|----------------|---------------------------------------------------------------------------------------------|-------|----------|-------|--------------------|-------|---------------------------------------------------------------------------------|-----|
| <i>Calothrix</i> sp. PCC 6303                                  | glucose        | BG11 (55) at half of the normal conc. in 75 % sea water with 4 µg/l vitamin B <sub>12</sub> | 25 °C | 100 ftc  | n. t. | + (56 mM)          | n. t. | + (56 mM)                                                                       | 87  |
|                                                                | glucose        | BG11-0 (23)                                                                                 | 25 °C | < 500 lx | n. t. | - (17 – 28 mM)     | n. t. | n. t.                                                                           | 23  |
|                                                                | sucrose        | BG11-0 (23)                                                                                 | 25 °C | < 500 lx | n. t. | + (9 – 15 mM)      | n. t. | n. t.                                                                           | 23  |
| <i>Calothrix</i> sp. PCC 7101<br>( <i>Tolypothrix tenuis</i> ) | casamino acids | basal mineral medium (126)                                                                  | 32 °C | no light | n. t. | n. t.              | n. t. | + (3 – 55 mM)                                                                   | 126 |
|                                                                | glucose        | basal mineral medium (126)                                                                  | 32 °C | no light | n. t. | n. t.              | n. t. | + (25 – 110 mM, only if ammonia or casamino acids were used as nitrogen source) | 126 |
|                                                                | glucose        | BG11-0 (23)                                                                                 | 25 °C | < 500 lx | n. t. | + (17 – 28 mM, 23) | n. t. | n. t.                                                                           | 23  |
|                                                                | fructose       | basal mineral medium (126)                                                                  | 32 °C | no light | n. t. | n. t.              | n. t. | 55 mM (ammonia or casamino acids added as nitrogen source)                      | 126 |
|                                                                | fructose       | BG11-0 (23)                                                                                 | 25 °C | < 500 lx | n. t. | + (17 – 28 mM)     | n. t. | n. t.                                                                           | 23  |
|                                                                | ribose         | BG11-0 (23)                                                                                 | 25 °C | < 500 lx | n. t. | + (33 mM)          | n. t. | n. t.                                                                           | 23  |
|                                                                | sucrose        | BG11-0 (23)                                                                                 | 25 °C | < 500 lx | n. t. | - (9 – 15 mM)      | n. t. | n. t.                                                                           | 23  |
| <i>Calothrix</i> sp. PCC 7102                                  | glucose        | BG11-0 (23)                                                                                 | 25 °C | < 500 lx | n. t. | + (17 – 28 mM)     | n. t. | n. t.                                                                           | 23  |
|                                                                | fructose       | BG11-0 (23)                                                                                 | 25 °C | < 500 lx | n. t. | + (17 – 28 mM)     | n. t. | n. t.                                                                           | 23  |
|                                                                | ribose         | BG11-0 (23)                                                                                 | 25 °C | < 500 lx | n. t. | - (33 mM)          | n. t. | n. t.                                                                           | 23  |
|                                                                | sucrose        | BG11-0 (23)                                                                                 | 25 °C | < 500 lx | n. t. | - (9 – 15 mM)      | n. t. | n. t.                                                                           | 23  |
| <i>Calothrix</i> sp. PCC 7103                                  | glucose        | BG11-0 (23)                                                                                 | 25 °C | < 500 lx | n. t. | + (17 – 28 mM)     | n. t. | n. t.                                                                           | 23  |
|                                                                | fructose       | BG11-0 (23)                                                                                 | 25 °C | < 500 lx | n. t. | + (17 – 28 mM)     | n. t. | n. t.                                                                           | 23  |
|                                                                | sucrose        | BG11-0 (23)                                                                                 | 25 °C | < 500 lx | n. t. | + (9 – 15 mM)      | n. t. | n. t.                                                                           | 23  |
|                                                                | ribose         | BG11-0 (23)                                                                                 | 25 °C | < 500 lx | n. t. | - (33 mM)          | n. t. | n. t.                                                                           | 23  |
| <i>Calothrix</i> sp. PCC 7111                                  | glucose        | BG11-0 (23)                                                                                 | 25 °C | < 500 lx | n. t. | + (17 – 28 mM)     | n. t. | n. t.                                                                           | 23  |
|                                                                | fructose       | BG11-0 (23)                                                                                 | 25 °C | < 500 lx | n. t. | +/- (17 – 28 mM)   | n. t. | n. t.                                                                           | 23  |
|                                                                | sucrose        | BG11-0 (23)                                                                                 | 25 °C | < 500 lx | n. t. | + (9 – 15 mM)      | n. t. | n. t.                                                                           | 23  |
|                                                                | ribose         | BG11-0 (23)                                                                                 | 25 °C | < 500 lx | n. t. | - (33 mM)          | n. t. | n. t.                                                                           | 23  |
| <i>Calothrix</i> sp. PCC 7116                                  | glucose        | MN (23)                                                                                     | 25 °C | < 500 lx | n. t. | +/- (17 – 28 mM)   | n. t. | n. t.                                                                           | 23  |
|                                                                | fructose       | MN (23)                                                                                     | 25 °C | < 500 lx | n. t. | +/- (17 – 28 mM)   | n. t. | n. t.                                                                           | 23  |
|                                                                | ribose         | MN (23)                                                                                     | 25 °C | < 500 lx | n. t. | +/- (33 mM)        | n. t. | n. t.                                                                           | 23  |
|                                                                | sucrose        | MN (23)                                                                                     | 25 °C | < 500 lx | n. t. | + (9 – 15 mM)      | n. t. | n. t.                                                                           | 23  |
| <i>Calothrix</i> sp. PCC 7204                                  | glucose        | BG11-0 (23)                                                                                 | 25 °C | < 500 lx | n. t. | + (17 – 28 mM)     | n. t. | n. t.                                                                           | 23  |
|                                                                | fructose       | BG11-0 (23)                                                                                 | 25 °C | < 500 lx | n. t. | +/- (17 – 28 mM)   | n. t. | n. t.                                                                           | 23  |
|                                                                | sucrose        | BG11-0 (23)                                                                                 | 25 °C | < 500 lx | n. t. | + (9 – 15 mM)      | n. t. | n. t.                                                                           | 23  |
|                                                                | ribose         | BG11-0 (23)                                                                                 | 25 °C | < 500 lx | n. t. | - (33 mM)          | n. t. | n. t.                                                                           | 23  |
| <i>Calothrix</i> sp. PCC 7415                                  | glucose        | BG11-0 (23)                                                                                 | 25 °C | < 500 lx | n. t. | + (17 – 28 mM)     | n. t. | n. t.                                                                           | 23  |
|                                                                | fructose       | BG11-0 (23)                                                                                 | 25 °C | < 500 lx | n. t. | + (17 – 28 mM)     | n. t. | n. t.                                                                           | 23  |
|                                                                | sucrose        | BG11-0 (23)                                                                                 | 25 °C | < 500 lx | n. t. | + (9 – 15 mM)      | n. t. | n. t.                                                                           | 23  |
|                                                                | ribose         | BG11-0 (23)                                                                                 | 25 °C | < 500 lx | n. t. | - (33 mM)          | n. t. | n. t.                                                                           | 23  |
| <i>Calothrix</i> sp. PCC 7426                                  | glucose        | MN (23)                                                                                     | 25 °C | < 500 lx | n. t. | +/- (17 – 28 mM)   | n. t. | n. t.                                                                           | 23  |
|                                                                | fructose       | MN (23)                                                                                     | 25 °C | < 500 lx | n. t. | +/- (17 – 28 mM)   | n. t. | n. t.                                                                           | 23  |
|                                                                | ribose         | MN (23)                                                                                     | 25 °C | < 500 lx | n. t. | + (33 mM)          | n. t. | n. t.                                                                           | 23  |

|                                                                                 |                 |                             |       |          |       |                   |       |                                                                                   |     |
|---------------------------------------------------------------------------------|-----------------|-----------------------------|-------|----------|-------|-------------------|-------|-----------------------------------------------------------------------------------|-----|
|                                                                                 | sucrose         | MN (23)                     | 25 °C | < 500 lx | n. t. | + (9 – 15 mM)     | n. t. | n. t.                                                                             | 23  |
| <i>Calothrix</i> sp. PCC 7504                                                   | glucose         | BG11-0 (23)                 | 25 °C | < 500 lx | n. t. | + (17 – 28 mM)    | n. t. | n. t.                                                                             | 23  |
|                                                                                 | fructose        | BG11-0 (23)                 | 25 °C | < 500 lx | n. t. | + (17 – 28 mM)    | n. t. | n. t.                                                                             | 23  |
|                                                                                 | ribose          | BG11-0 (23)                 | 25 °C | < 500 lx | n. t. | + (33 mM)         | n. t. | n. t.                                                                             | 23  |
|                                                                                 | sucrose         | BG11-0 (23)                 | 25 °C | < 500 lx | n. t. | - (9 – 15 mM)     | n. t. | n. t.                                                                             | 23  |
| <i>Calothrix</i> sp. PCC 7507                                                   | fructose        | BG11-0 (23)                 | 25 °C | < 500 lx | n. t. | + (17 – 28 mM)    | n. t. | n. t.                                                                             | 23  |
|                                                                                 | glucose         | BG11-0 (23)                 | 25 °C | < 500 lx | n. t. | - (17 – 28 mM)    | n. t. | n. t.                                                                             | 23  |
|                                                                                 | sucrose         | BG11-0 (23)                 | 25 °C | < 500 lx | n. t. | - (9 – 15 mM)     | n. t. | n. t.                                                                             | 23  |
|                                                                                 | ribose          | BG11-0 (23)                 | 25 °C | < 500 lx | n. t. | - (33 mM)         | n. t. | n. t.                                                                             | 23  |
| <i>Chamaesiphon</i> sp. PCC 7430                                                | glucose         | BG11 (23)                   | 25 °C | < 500 lx | n. t. | + (17 – 28 mM)    | n. t. | n. t.                                                                             | 23  |
|                                                                                 | fructose        | BG11 (23)                   | 25 °C | < 500 lx | n. t. | + (17 – 28 mM)    | n. t. | n. t.                                                                             | 23  |
|                                                                                 | sucrose         | BG11 (23)                   | 25 °C | < 500 lx | n. t. | + (9 – 15 mM)     | n. t. | n. t.                                                                             | 23  |
| <i>Chlorogloeopsis</i> sp. PCC 6718                                             | glucose         | BG11 (23)                   | 25 °C | < 500 lx | n. t. | + (17 – 28 mM)    | n. t. | n. t.                                                                             | 23  |
|                                                                                 | fructose        | BG11 (23)                   | 25 °C | < 500 lx | n. t. | + (17 – 28 mM)    | n. t. | n. t.                                                                             | 23  |
|                                                                                 | ribose          | BG11 (23)                   | 25 °C | < 500 lx | n. t. | + (33 mM)         | n. t. | n. t.                                                                             | 23  |
|                                                                                 | sucrose         | BG11 (23)                   | 25 °C | < 500 lx | n. t. | ++ (9 – 15 mM)    | n. t. | n. t.                                                                             | 23  |
| <i>Chlorogloeopsis</i> sp. PCC 6912 ( <i>Chlorogloea fritschii</i> CCAP 1411/1) | glucose         | BG11-0 (23)                 | 25 °C | < 500 lx | n. t. | + (17 mM – 28 mM) | n. t. | n. t.                                                                             | 23  |
|                                                                                 | fructose        | BG11-0 (23)                 | 25 °C | < 500 lx | n. t. | + (17 – 28 mM)    | n. t. | n. t.                                                                             | 23  |
|                                                                                 | ribose          | BG11-0 (23)                 | 25 °C | < 500 lx | n. t. | + (33 mM)         | n. t. | n. t.                                                                             | 23  |
|                                                                                 | sucrose         | BG11-0 (23)                 | 25 °C | < 500 lx | n. t. | ++ (9 – 15 mM)    | n. t. | n. t.                                                                             | 23  |
| <i>Chlorogloea fritschii</i>                                                    | sucrose         | Allen and Arnon medium (S2) | 30 °C | no light | n. t. | n. t.             | n. t. | + (10 mM with nitrate and N <sub>2</sub> )                                        | 109 |
|                                                                                 | maltose         | Allen and Arnon medium (S2) | 30 °C | no light | n. t. | n. t.             | n. t. | + (10 mM with nitrate and N <sub>2</sub> )                                        | 109 |
|                                                                                 | glutamine       | Allen and Arnon medium (S2) | 30 °C | no light | n. t. | n. t.             | n. t. | + (10 mM with nitrate and N <sub>2</sub> )                                        | 109 |
|                                                                                 | glycine         | Allen and Arnon medium (S2) | 30 °C | no light | n. t. | n. t.             | n. t. | + (10 mM with nitrate and N <sub>2</sub> )                                        | 109 |
|                                                                                 | glucose         | Allen and Arnon medium (S2) | 30 °C | no light | n. t. | n. t.             | n. t. | + (10 – 100 mM, 10 mM only with nitrate, 100 mM with nitrate and N <sub>2</sub> ) | 109 |
|                                                                                 | mannitol        | Allen and Arnon medium (S2) | 30 °C | no light | n. t. | n. t.             | n. t. | + (10 mM only with nitrate)                                                       | 109 |
|                                                                                 | acetate         | Allen and Arnon medium (S2) | 30 °C | no light | n. t. | n. t.             | n. t. | - (10 mM)                                                                         | 109 |
|                                                                                 | pyruvate        | Allen and Arnon medium (S2) | 30 °C | no light | n. t. | n. t.             | n. t. | - (10 mM)                                                                         | 109 |
|                                                                                 | citrate         | Allen and Arnon medium (S2) | 30 °C | no light | n. t. | n. t.             | n. t. | - (10 mM)                                                                         | 109 |
|                                                                                 | α-ketoglutarate | Allen and Arnon medium (S2) | 30 °C | no light | n. t. | n. t.             | n. t. | - (10 mM)                                                                         | 109 |
|                                                                                 | succinate       | Allen and Arnon medium (S2) | 30 °C | no light | n. t. | n. t.             | n. t. | - (10 mM)                                                                         | 109 |

|                                       |           |                             |       |          |       |                   |       |           |     |
|---------------------------------------|-----------|-----------------------------|-------|----------|-------|-------------------|-------|-----------|-----|
|                                       | fumarate  | Allen and Arnon medium (S2) | 30 °C | no light | n. t. | n. t.             | n. t. | - (10 mM) | 109 |
|                                       | malate    | Allen and Arnon medium (S2) | 30 °C | no light | n. t. | n. t.             | n. t. | - (10 mM) | 109 |
|                                       | glycolate | Allen and Arnon medium (S2) | 30 °C | no light | n. t. | n. t.             | n. t. | - (10 mM) | 109 |
|                                       | arabinose | Allen and Arnon medium (S2) | 30 °C | no light | n. t. | n. t.             | n. t. | - (10 mM) | 109 |
|                                       | fructose  | Allen and Arnon medium (S2) | 30 °C | no light | n. t. | n. t.             | n. t. | - (10 mM) | 109 |
|                                       | glutamate | Allen and Arnon medium (S2) | 30 °C | no light | n. t. | n. t.             | n. t. | - (10 mM) | 109 |
|                                       | aspartate | Allen and Arnon medium (S2) | 30 °C | no light | n. t. | n. t.             | n. t. | - (10 mM) | 109 |
| <i>Chroococcidiopsis</i> sp. PCC 6712 | glucose   | BG11 (23)                   | 25 °C | < 500 lx | n. t. | + (17 – 28 mM)    | n. t. | n. t.     | 23  |
|                                       | fructose  | BG11 (23)                   | 25 °C | < 500 lx | n. t. | + (17 – 28 mM)    | n. t. | n. t.     | 23  |
|                                       | sucrose   | BG11 (23)                   | 25 °C | < 500 lx | n. t. | + (9 – 15 mM)     | n. t. | n. t.     | 23  |
| <i>Chroococcidiopsis</i> sp. PCC 7203 | glucose   | BG11 (23)                   | 25 °C | < 500 lx | n. t. | + (17 – 28 mM)    | n. t. | n. t.     | 23  |
|                                       | fructose  | BG11 (23)                   | 25 °C | < 500 lx | n. t. | + (17 – 28 mM)    | n. t. | n. t.     | 23  |
|                                       | sucrose   | BG11 (23)                   | 25 °C | < 500 lx | n. t. | + (9 – 15 mM)     | n. t. | n. t.     | 23  |
| <i>Chroococcidiopsis</i> sp. PCC 7431 | glucose   | BG11 (23)                   | 25 °C | < 500 lx | n. t. | + (17 mM – 28 mM) | n. t. | n. t.     | 23  |
|                                       | fructose  | BG11 (23)                   | 25 °C | < 500 lx | n. t. | + (17 – 28 mM)    | n. t. | n. t.     | 23  |
|                                       | sucrose   | BG11 (23)                   | 25 °C | < 500 lx | n. t. | + (9 – 15 mM)     | n. t. | n. t.     | 23  |
| <i>Chroococcidiopsis</i> sp. PCC 7432 | glucose   | BG11 (23)                   | 25 °C | < 500 lx | n. t. | + (17 – 28 mM)    | n. t. | n. t.     | 23  |
|                                       | fructose  | BG11 (23)                   | 25 °C | < 500 lx | n. t. | + (17 – 28 mM)    | n. t. | n. t.     | 23  |
|                                       | sucrose   | BG11 (23)                   | 25 °C | < 500 lx | n. t. | + (9 – 15 mM)     | n. t. | n. t.     | 23  |
| <i>Chroococcidiopsis</i> sp. PCC 7433 | glucose   | BG11 (23)                   | 25 °C | < 500 lx | n. t. | + (17 – 28 mM)    | n. t. | n. t.     | 23  |
|                                       | fructose  | BG11 (23)                   | 25 °C | < 500 lx | n. t. | + (17 – 28 mM)    | n. t. | n. t.     | 23  |
|                                       | sucrose   | BG11 (23)                   | 25 °C | < 500 lx | n. t. | + (9 – 15 mM)     | n. t. | n. t.     | 23  |
| <i>Chroococcidiopsis</i> sp. PCC 7434 | fructose  | BG11 (23)                   | 25 °C | < 500 lx | n. t. | + (17 – 28 mM)    | n. t. | n. t.     | 23  |
|                                       | glucose   | BG11 (23)                   | 25 °C | < 500 lx | n. t. | - (17 – 28 mM)    | n. t. | n. t.     | 23  |
|                                       | sucrose   | BG11 (23)                   | 25 °C | < 500 lx | n. t. | - (9 – 15 mM)     | n. t. | n. t.     | 23  |
| <i>Chroococcidiopsis</i> sp. PCC 7436 | glucose   | BG11 (23)                   | 25 °C | < 500 lx | n. t. | + (17 – 28 mM)    | n. t. | n. t.     | 23  |
|                                       | fructose  | BG11 (23)                   | 25 °C | < 500 lx | n. t. | + (17 – 28 mM)    | n. t. | n. t.     | 23  |
|                                       | sucrose   | BG11 (23)                   | 25 °C | < 500 lx | n. t. | + (9 – 15 mM)     | n. t. | n. t.     | 23  |
| <i>Chroococcidiopsis</i> sp. PCC 7439 | glucose   | BG11 (23)                   | 25 °C | < 500 lx | n. t. | + (17 – 28 mM)    | n. t. | n. t.     | 23  |
|                                       | fructose  | BG11 (23)                   | 25 °C | < 500 lx | n. t. | + (17 – 28 mM)    | n. t. | n. t.     | 23  |
|                                       | sucrose   | BG11 (23)                   | 25 °C | < 500 lx | n. t. | + (9 – 15 mM)     | n. t. | n. t.     | 23  |

|                                                                                 |                 |                                    |       |                                       |                            |                |       |       |    |
|---------------------------------------------------------------------------------|-----------------|------------------------------------|-------|---------------------------------------|----------------------------|----------------|-------|-------|----|
| <i>Cyanothece</i> sp. ATCC 51141                                                | glycerol        | ASP-2 medium (S3) modified by (53) | 30 °C | 80 $\mu\text{E m}^{-2} \text{s}^{-1}$ | n. t.                      | + (10 mM)      | n. t. | n. t. | 41 |
|                                                                                 | glucose         | ASP-2 medium (S3) modified by (53) | 30 °C | 80 $\mu\text{E m}^{-2} \text{s}^{-1}$ | n. t.                      | - (not stated) | n. t. | n. t. | 41 |
|                                                                                 | fructose        | ASP-2 medium (S3) modified by (53) | 30 °C | 80 $\mu\text{E m}^{-2} \text{s}^{-1}$ | n. t.                      | - (not stated) | n. t. | n. t. | 41 |
|                                                                                 | sucrose         | ASP-2 medium (S3) modified by (53) | 30 °C | 80 $\mu\text{E m}^{-2} \text{s}^{-1}$ | n. t.                      | - (not stated) | n. t. | n. t. | 41 |
| <i>Cyanothece</i> sp. ATCC 51142<br>( <i>Crocospaera subtropica</i> ATCC 51142) | glycerol        | ASP-2 medium (S3) modified by (53) | 30 °C | 80 $\mu\text{E m}^{-2} \text{s}^{-1}$ | n. t.                      | + (10 mM)      | n. t. | n. t. | 41 |
|                                                                                 | glycerol        | ASP-2 medium (S3) modified by (53) | 30 °C | 50 $\mu\text{E m}^{-2} \text{s}^{-1}$ | + (54 mM)                  | n. t.          | n. t. | n. t. | 46 |
|                                                                                 | glucose         | ASP-2 medium (S3) modified by (53) | 30 °C | 80 $\mu\text{E m}^{-2} \text{s}^{-1}$ | n. t.                      | - (not stated) | n. t. | n. t. | 41 |
|                                                                                 | fructose        | ASP-2 medium (S3) modified by (53) | 30 °C | 80 $\mu\text{E m}^{-2} \text{s}^{-1}$ | n. t.                      | - (not stated) | n. t. | n. t. | 41 |
|                                                                                 | sucrose         | ASP-2 medium (S3) modified by (53) | 30 °C | 80 $\mu\text{E m}^{-2} \text{s}^{-1}$ | n. t.                      | - (not stated) | n. t. | n. t. | 41 |
|                                                                                 | glucose         | ASP-2 medium (S3) modified by (53) | 30 °C | 50 $\mu\text{E m}^{-2} \text{s}^{-1}$ | +/- (26 mM)                | n. t.          | n. t. | n. t. | 46 |
|                                                                                 | sodium pyruvate | ASP-2 medium (S3) modified by (53) | 30 °C | 50 $\mu\text{E m}^{-2} \text{s}^{-1}$ | - (9 mM),<br>toxic (64 mM) | n. t.          | n. t. | n. t. | 46 |
| <i>Cylindrospermum</i> sp. PCC 7417                                             | fructose        | BG11-0 (23)                        | 25 °C | < 500 lx                              | n. t.                      | + (17 – 28 mM) | n. t. | n. t. | 23 |
|                                                                                 | sucrose         | BG11-0 (23)                        | 25 °C | < 500 lx                              | n. t.                      | + (9 – 15 mM)  | n. t. | n. t. | 23 |
| <i>Dermocarpa</i> sp. PCC 7301                                                  | glucose         | MN (23)                            | 25 °C | < 500 lx                              | n. t.                      | + (17 – 28 mM) | n. t. | n. t. | 23 |
|                                                                                 | fructose        | MN (23)                            | 25 °C | < 500 lx                              | n. t.                      | + (17 – 28 mM) | n. t. | n. t. | 23 |
|                                                                                 | sucrose         | MN (23)                            | 25 °C | < 500 lx                              | n. t.                      | + (9 – 15 mM)  | n. t. | n. t. | 23 |
| <i>Dermocarpa</i> sp. PCC 7304                                                  | glucose         | ASN-III (23)                       | 25 °C | < 500 lx                              | n. t.                      | + (17 – 28 mM) | n. t. | n. t. | 23 |
|                                                                                 | sucrose         | ASN-III (23)                       | 25 °C | < 500 lx                              | n. t.                      | + (9 – 15 mM)  | n. t. | n. t. | 23 |
|                                                                                 | fructose        | ASN-III (23)                       | 25 °C | < 500 lx                              | n. t.                      | - (17 – 28 mM) | n. t. | n. t. | 23 |
| <i>Dermocarpa</i> sp. PCC 7437                                                  | glucose         | BG11 (23)                          | 25 °C | < 500 lx                              | n. t.                      | + (17 – 28 mM) | n. t. | n. t. | 23 |

|                                   |          |             |       |          |       |                |       |       |    |
|-----------------------------------|----------|-------------|-------|----------|-------|----------------|-------|-------|----|
|                                   | sucrose  | BG11 (23)   | 25 °C | < 500 lx | n. t. | + (9 – 15 mM)  | n. t. | n. t. | 23 |
|                                   | fructose | BG11 (23)   | 25 °C | < 500 lx | n. t. | - (17 – 28 mM) | n. t. | n. t. | 23 |
| <i>Dermocarpa</i> sp. PCC 7438    | glucose  | BG11 (23)   | 25 °C | < 500 lx | n. t. | + (17 – 28 mM) | n. t. | n. t. | 23 |
|                                   | fructose | BG11 (23)   | 25 °C | < 500 lx | n. t. | + (17 – 28 mM) | n. t. | n. t. | 23 |
|                                   | sucrose  | BG11 (23)   | 25 °C | < 500 lx | n. t. | - (9 – 15 mM)  | n. t. | n. t. | 23 |
| <i>Dermocarpella</i> sp. PCC 7326 | glucose  | MN (23)     | 25 °C | < 500 lx | n. t. | + (17 – 28 mM) | n. t. | n. t. | 23 |
|                                   | fructose | MN (23)     | 25 °C | < 500 lx | n. t. | + (17 – 28 mM) | n. t. | n. t. | 23 |
|                                   | sucrose  | MN (23)     | 25 °C | < 500 lx | n. t. | + (9 – 15 mM)  | n. t. | n. t. | 23 |
| <i>Fischerella</i> sp. PCC 7115   | glucose  | BG11-0 (23) | 37 °C | < 500 lx | n. t. | + (17 – 28 mM) | n. t. | n. t. | 23 |
|                                   | fructose | BG11-0 (23) | 37 °C | < 500 lx | n. t. | + (17 – 28 mM) | n. t. | n. t. | 23 |
|                                   | sucrose  | BG11-0 (23) | 37 °C | < 500 lx | n. t. | + (9 – 15 mM)  | n. t. | n. t. | 23 |
|                                   | ribose   | BG11-0 (23) | 37 °C | < 500 lx | n. t. | - (33 mM)      | n. t. | n. t. | 23 |
| <i>Fischerella</i> sp. PCC 73103  | glucose  | BG11-0 (23) | 37 °C | < 500 lx | n. t. | + (17 – 28 mM) | n. t. | n. t. | 23 |
|                                   | fructose | BG11-0 (23) | 37 °C | < 500 lx | n. t. | + (17 – 28 mM) | n. t. | n. t. | 23 |
|                                   | sucrose  | BG11-0 (23) | 37 °C | < 500 lx | n. t. | + (9 – 15 mM)  | n. t. | n. t. | 23 |
|                                   | ribose   | BG11-0 (23) | 37 °C | < 500 lx | n. t. | - (33 mM)      | n. t. | n. t. | 23 |
| <i>Fischerella</i> sp. PCC 7414   | glucose  | BG11-0 (23) | 37 °C | < 500 lx | n. t. | + (17 – 28 mM) | n. t. | n. t. | 23 |
|                                   | fructose | BG11-0 (23) | 37 °C | < 500 lx | n. t. | + (17 – 28 mM) | n. t. | n. t. | 23 |
|                                   | sucrose  | BG11-0 (23) | 37 °C | < 500 lx | n. t. | + (9 – 15 mM)  | n. t. | n. t. | 23 |
|                                   | ribose   | BG11-0 (23) | 37 °C | < 500 lx | n. t. | - (33 mM)      | n. t. | n. t. | 23 |
| <i>Fischerella</i> sp. PCC 7520   | glucose  | BG11-0 (23) | 37 °C | < 500 lx | n. t. | + (17 – 28 mM) | n. t. | n. t. | 23 |
|                                   | fructose | BG11-0 (23) | 37 °C | < 500 lx | n. t. | + (17 – 28 mM) | n. t. | n. t. | 23 |
|                                   | sucrose  | BG11-0 (23) | 37 °C | < 500 lx | n. t. | + (9 – 15 mM)  | n. t. | n. t. | 23 |
|                                   | ribose   | BG11-0 (23) | 37 °C | < 500 lx | n. t. | - (33 mM)      | n. t. | n. t. | 23 |
| <i>Fischerella</i> sp. PCC 7521   | glucose  | BG11 (23)   | 37 °C | < 500 lx | n. t. | + (17 – 28 mM) | n. t. | n. t. | 23 |
|                                   | fructose | BG11-0 (23) | 37 °C | < 500 lx | n. t. | + (17 – 28 mM) | n. t. | n. t. | 23 |
|                                   | ribose   | BG11-0 (23) | 37 °C | < 500 lx | n. t. | +/- (33 mM)    | n. t. | n. t. | 23 |
|                                   | sucrose  | BG11-0 (23) | 37 °C | < 500 lx | n. t. | + (9 – 15 mM)  | n. t. | n. t. | 23 |
| <i>Fischerella</i> sp. PCC 7522   | glucose  | BG11-0 (23) | 37 °C | < 500 lx | n. t. | + (17 – 28 mM) | n. t. | n. t. | 23 |
|                                   | fructose | BG11-0 (23) | 37 °C | < 500 lx | n. t. | + (17 – 28 mM) | n. t. | n. t. | 23 |
|                                   | ribose   | BG11-0 (23) | 37 °C | < 500 lx | n. t. | + (33 mM)      | n. t. | n. t. | 23 |
|                                   | sucrose  | BG11-0 (23) | 37 °C | < 500 lx | n. t. | - (9 – 15 mM)  | n. t. | n. t. | 23 |
| <i>Fischerella</i> sp. PCC 7523   | glucose  | BG11-0 (23) | 37 °C | < 500 lx | n. t. | + (17 – 28 mM) | n. t. | n. t. | 23 |
|                                   | fructose | BG11-0 (23) | 37 °C | < 500 lx | n. t. | + (17 – 28 mM) | n. t. | n. t. | 23 |
|                                   | ribose   | BG11-0 (23) | 37 °C | < 500 lx | n. t. | + (33 mM)      | n. t. | n. t. | 23 |
|                                   | sucrose  | BG11-0 (23) | 37 °C | < 500 lx | n. t. | + (9 – 15 mM)  | n. t. | n. t. | 23 |
| <i>Gloeocapsa</i> sp. PCC 7428    | glucose  | BG11 (23)   | 25 °C | < 500 lx | n. t. | + (17 – 28 mM) | n. t. | n. t. | 23 |



|                                                                              |          |                                    |       |                                                      |           |                |           |             |    |
|------------------------------------------------------------------------------|----------|------------------------------------|-------|------------------------------------------------------|-----------|----------------|-----------|-------------|----|
|                                                                              | fructose | BG11 (23)                          | 25 °C | < 500 lx                                             | n. t.     | + (17 – 28 mM) | n. t.     | n. t.       | 23 |
|                                                                              | ribose   | BG11 (23)                          | 25 °C | < 500 lx                                             | n. t.     | + (33 mM)      | n. t.     | n. t.       | 23 |
|                                                                              | sucrose  | BG11 (23)                          | 25 °C | < 500 lx                                             | n. t.     | + (9 – 15 mM)  | n. t.     | n. t.       | 23 |
|                                                                              | glycerol | BG11 (23)                          | 25 °C | < 500 lx                                             | n. t.     | - (11 mM)      | n. t.     | n. t.       | 23 |
| <i>Gloeocapsa</i> sp. PCC 7501                                               | glucose  | BG11 (23)                          | 25 °C | < 500 lx                                             | n. t.     | + (17 – 28 mM) | n. t.     | n. t.       | 23 |
|                                                                              | fructose | BG11 (23)                          | 25 °C | < 500 lx                                             | n. t.     | - (17 – 28 mM) | n. t.     | n. t.       | 23 |
|                                                                              | ribose   | BG11 (23)                          | 25 °C | < 500 lx                                             | n. t.     | - (33 mM)      | n. t.     | n. t.       | 23 |
|                                                                              | sucrose  | BG11 (23)                          | 25 °C | < 500 lx                                             | n. t.     | - (9 – 15 mM)  | n. t.     | n. t.       | 23 |
|                                                                              | glycerol | BG11 (23)                          | 25 °C | < 500 lx                                             | n. t.     | - (11 mM)      | n. t.     | n. t.       | 23 |
| LPP strain PCC 7113                                                          | sucrose  | BG11 (23)                          | 25 °C | < 500 lx                                             | n. t.     | + (9 – 15 mM)  | n. t.     | n. t.       | 23 |
|                                                                              | glucose  | BG11 (23)                          | 25 °C | < 500 lx                                             | n. t.     | - (17 – 28 mM) | n. t.     | n. t.       | 23 |
|                                                                              | fructose | BG11 (23)                          | 25 °C | < 500 lx                                             | n. t.     | - (17 – 28 mM) | n. t.     | n. t.       | 23 |
|                                                                              | ribose   | BG11 (23)                          | 25 °C | < 500 lx                                             | n. t.     | - (33 mM)      | n. t.     | n. t.       | 23 |
|                                                                              | glycerol | BG11 (23)                          | 25 °C | < 500 lx                                             | n. t.     | - (11 mM)      | n. t.     | n. t.       | 23 |
| LPP strain PCC 7114                                                          | glucose  | BG11 (23)                          | 25 °C | < 500 lx                                             | n. t.     | + (17 – 28 mM) | n. t.     | n. t.       | 23 |
|                                                                              | sucrose  | BG11 (23)                          | 25 °C | < 500 lx                                             | n. t.     | + (9 – 15 mM)  | n. t.     | n. t.       | 23 |
|                                                                              | fructose | BG11 (23)                          | 25 °C | < 500 lx                                             | n. t.     | - (17 – 28 mM) | n. t.     | n. t.       | 23 |
|                                                                              | ribose   | BG11 (23)                          | 25 °C | < 500 lx                                             | n. t.     | - (33 mM)      | n. t.     | n. t.       | 23 |
|                                                                              | glycerol | BG11 (23)                          | 25 °C | < 500 lx                                             | n. t.     | - (11 mM)      | n. t.     | n. t.       | 23 |
| LPP strain PCC 7123                                                          | glucose  | BG11 (23)                          | 25 °C | < 500 lx                                             | n. t.     | + (17 – 28 mM) | n. t.     | n. t.       | 23 |
|                                                                              | fructose | BG11 (23)                          | 25 °C | < 500 lx                                             | n. t.     | + (17 – 28 mM) | n. t.     | n. t.       | 23 |
|                                                                              | sucrose  | BG11 (23)                          | 25 °C | < 500 lx                                             | n. t.     | + (9 – 15 mM)  | n. t.     | n. t.       | 23 |
|                                                                              | ribose   | BG11 (23)                          | 25 °C | < 500 lx                                             | n. t.     | - (33 mM)      | n. t.     | n. t.       | 23 |
|                                                                              | glycerol | BG11 (23)                          | 25 °C | < 500 lx                                             | n. t.     | - (11 mM)      | n. t.     | n. t.       | 23 |
| LPP strain PCC 7124                                                          | glucose  | BG11 (23)                          | 25 °C | < 500 lx                                             | n. t.     | + (17 – 28 mM) | n. t.     | n. t.       | 23 |
|                                                                              | fructose | BG11 (23)                          | 25 °C | < 500 lx                                             | n. t.     | + (17 – 28 mM) | n. t.     | n. t.       | 23 |
|                                                                              | sucrose  | BG11 (23)                          | 25 °C | < 500 lx                                             | n. t.     | + (9 – 15 mM)  | n. t.     | n. t.       | 23 |
|                                                                              | ribose   | BG11 (23)                          | 25 °C | < 500 lx                                             | n. t.     | - (33 mM)      | n. t.     | n. t.       | 23 |
|                                                                              | glycerol | BG11 (23)                          | 25 °C | < 500 lx                                             | n. t.     | - (11 mM)      | n. t.     | n. t.       | 23 |
| LPP strain PCC 7410                                                          | glucose  | BG11 (23)                          | 25 °C | < 500 lx                                             | n. t.     | + (17 – 28 mM) | n. t.     | n. t.       | 23 |
|                                                                              | fructose | BG11 (23)                          | 25 °C | < 500 lx                                             | n. t.     | + (17 – 28 mM) | n. t.     | n. t.       | 23 |
|                                                                              | ribose   | BG11 (23)                          | 25 °C | < 500 lx                                             | n. t.     | + (33 mM)      | n. t.     | n. t.       | 23 |
|                                                                              | sucrose  | BG11 (23)                          | 25 °C | < 500 lx                                             | n. t.     | + (9 – 15 mM)  | n. t.     | n. t.       | 23 |
|                                                                              | glycerol | BG11 (23)                          | 25 °C | < 500 lx                                             | n. t.     | - (11 mM)      | n. t.     | n. t.       | 23 |
| LPP strain PCC 7505                                                          | glucose  | BG11 (23)                          | 25 °C | < 500 lx                                             | n. t.     | + (17 – 28 mM) | n. t.     | n. t.       | 23 |
|                                                                              | fructose | BG11 (23)                          | 25 °C | < 500 lx                                             | n. t.     | + (17 – 28 mM) | n. t.     | n. t.       | 23 |
|                                                                              | ribose   | BG11 (23)                          | 25 °C | < 500 lx                                             | n. t.     | + (33 mM)      | n. t.     | n. t.       | 23 |
|                                                                              | sucrose  | BG11 (23)                          | 25 °C | < 500 lx                                             | n. t.     | + (9 – 15 mM)  | n. t.     | n. t.       | 23 |
|                                                                              | glycerol | BG11 (23)                          | 25 °C | < 500 lx                                             | n. t.     | - (11 mM)      | n. t.     | n. t.       | 23 |
| <i>Lyngbya lagerheimii</i> (strain Montauk, 39, and LPP strain PCC 7104, 23) | glucose  | ASP-2 medium (S3) modified by (53) | 30 °C | 10 ftc/40 μW cm <sup>-2</sup> (LAHG)<br>350 ftc (PM) | - (55 mM) | n. t.          | + (55 mM) | +/- (55 mM) | 30 |
|                                                                              | glucose  | BG11 (23)                          | 25 °C | < 500 lx                                             | n. t.     | + (17 – 28 mM) | n. t.     | n. t.       | 23 |
|                                                                              | fructose | BG11 (23)                          | 25 °C | < 500 lx                                             | n. t.     | + (17 – 28 mM) | n. t.     | n. t.       | 23 |

|                                                        |           |                                    |            |                                    |           |                  |                        |           |     |
|--------------------------------------------------------|-----------|------------------------------------|------------|------------------------------------|-----------|------------------|------------------------|-----------|-----|
|                                                        | sucrose   | ASP-2 medium (S3) modified by (53) | 30 °C      | 10 ftc/40 $\mu$ W $\text{cm}^{-2}$ | n. t.     | n. t.            | +/- (conc. not stated) | n. t.     | 30  |
|                                                        | sucrose   | BG11 (23)                          | 25 °C      | < 500 lx                           | n. t.     | + (9 – 15 mM)    | n. t.                  | n. t.     | 23  |
|                                                        | formate   | ASP-2 medium (S3) modified by (53) | 30 °C      | 10 ftc/40 $\mu$ W $\text{cm}^{-2}$ | n. t.     | n. t.            | - (11 – 22 mM)         | n. t.     | 30  |
|                                                        | acetate   | ASP-2 medium (S3) modified by (53) | 30 °C      | 10 ftc/40 $\mu$ W $\text{cm}^{-2}$ | n. t.     | n. t.            | - (8 – 17 mM)          | n. t.     | 30  |
|                                                        | pyruvate  | ASP-2 medium (S3) modified by (53) | 30 °C      | 10 ftc/40 $\mu$ W $\text{cm}^{-2}$ | n. t.     | n. t.            | - (6 – 11 mM)          | n. t.     | 30  |
|                                                        | succinate | ASP-2 medium (S3) modified by (53) | 30 °C      | 10 ftc/40 $\mu$ W $\text{cm}^{-2}$ | n. t.     | n. t.            | - (4 – 8 mM)           | n. t.     | 30  |
|                                                        | ribose    | BG11 (23)                          | 25 °C      | < 500 lx                           | n. t.     | - (33 mM)        | n. t.                  | n. t.     | 23  |
|                                                        | glycerol  | BG11 (23)                          | 25 °C      | < 500 lx                           | n. t.     | - (11 mM)        | n. t.                  | n. t.     | 23  |
| <i>Lyngbya</i> sp. PCC 7419                            | glucose   | MN (23)                            | 25 °C      | < 500 lx                           | n. t.     | +/- (17 – 28 mM) | n. t.                  | n. t.     | 23  |
|                                                        | fructose  | MN (23)                            | 25 °C      | < 500 lx                           | n. t.     | - (17 – 28 mM)   | n. t.                  | n. t.     | 23  |
|                                                        | sucrose   | MN (23)                            | 25 °C      | < 500 lx                           | n. t.     | - (9 – 15 mM)    | n. t.                  | n. t.     | 23  |
|                                                        | ribose    | MN (23)                            | 25 °C      | < 500 lx                           | n. t.     | - (33 mM)        | n. t.                  | n. t.     | 23  |
|                                                        | glycerol  | MN (23)                            | 25 °C      | < 500 lx                           | n. t.     | - (11 mM)        | n. t.                  | n. t.     | 23  |
| <i>Microcoleus vaginatus</i> (LPP strain PCC 7407, 23) | glucose   | BG11 (23)                          | 25 °C      | < 500 lx                           | n. t.     | + (17 – 28 mM)   | n. t.                  | n. t.     | 23  |
|                                                        | fructose  | BG11 (23)                          | 25 °C      | < 500 lx                           | n. t.     | + (17 – 28 mM)   | n. t.                  | n. t.     | 23  |
|                                                        | ribose    | BG11 (23)                          | 25 °C      | < 500 lx                           | n. t.     | + (33 mM)        | n. t.                  | n. t.     | 23  |
|                                                        | sucrose   | BG11 (23)                          | 25 °C      | < 500 lx                           | n. t.     | - (9 – 15 mM)    | n. t.                  | n. t.     | 23  |
|                                                        | glycerol  | BG11 (23)                          | 25 °C      | < 500 lx                           | n. t.     | - (11 mM)        | n. t.                  | n. t.     | 23  |
| <i>Myxosarcina</i> sp. PCC 7312                        | sucrose   | MN (23)                            | 25 °C      | < 500 lx                           | n. t.     | + (9 – 15 mM)    | n. t.                  | n. t.     | 23  |
|                                                        | glucose   | MN (23)                            | 25 °C      | < 500 lx                           | n. t.     | - (17 – 28 mM)   | n. t.                  | n. t.     | 23  |
|                                                        | fructose  | MN (23)                            | 25 °C      | < 500 lx                           | n. t.     | - (17 – 28 mM)   | n. t.                  | n. t.     | 23  |
| <i>Myxosarcina</i> sp. PCC 7325                        | glucose   | MN (23)                            | 25 °C      | < 500 lx                           | n. t.     | + (17 – 28 mM)   | n. t.                  | n. t.     | 23  |
|                                                        | sucrose   | MN (23)                            | 25 °C      | < 500 lx                           | n. t.     | + (9 – 15 mM)    | n. t.                  | n. t.     | 23  |
|                                                        | fructose  | MN (23)                            | 25 °C      | < 500 lx                           | n. t.     | - (17 – 28 mM)   | n. t.                  | n. t.     | 23  |
| <i>Nodularia</i> sp. PCC 73104                         | glucose   | BG11-0 (23)                        | 25 °C      | < 500 lx                           | n. t.     | + (17 – 28 mM)   | n. t.                  | n. t.     | 23  |
|                                                        | fructose  | BG11-0 (23)                        | 25 °C      | < 500 lx                           | n. t.     | + (17 – 28 mM)   | n. t.                  | n. t.     | 23  |
|                                                        | sucrose   | BG11-0 (23)                        | 25 °C      | < 500 lx                           | n. t.     | +/- (9 – 15 mM)  | n. t.                  | n. t.     | 23  |
| <i>Nostoc muscorum</i> A                               | glucose   | medium according to ref 113        | 24 – 27 °C | 175 – 350 ftc                      | + (56 mM) | n. t.            | n. t.                  | + (56 mM) | 113 |

|                        |               |                              |             |                      |           |                 |           |                |     |
|------------------------|---------------|------------------------------|-------------|----------------------|-----------|-----------------|-----------|----------------|-----|
|                        | glucose       | medium 2 (114)               | 24 +/- 2 °C | 0 – 450 ftc          | + (56 mM) | n. t.           | + (56 mM) | + (56 mM)      | 114 |
|                        | sucrose       | medium according to ref 113  | 24 – 27 °C  | 175 – 350 ftc        | + (29 mM) | n. t.           | n. t.     | n. t.          | 113 |
|                        | sucrose       | medium 2 (114)               | 24 +/- 2 °C | no light             | n. t.     | n.t.            | n. t.     | + (29 mM)      | 114 |
|                        | fructose      | medium 2 (114)               | 24 +/- 2 °C | no light             | n. t.     | n. t.           | n. t.     | + (not stated) | 114 |
|                        | maltose       | medium 2 (114)               | 24 +/- 2 °C | no light             | n. t.     | n. t.           | n. t.     | - (not stated) | 114 |
|                        | lactose       | medium 2 (114)               | 24 +/- 2 °C | no light             | n. t.     | n. t.           | n. t.     | - (not stated) | 114 |
|                        | glycerol      | medium 2 (114)               | 24 +/- 2 °C | no light             | n. t.     | n. t.           | n. t.     | - (not stated) | 114 |
|                        | cellobiose    | medium 2 (114)               | 24 +/- 2 °C | no light             | n. t.     | n. t.           | n. t.     | - (not stated) | 114 |
|                        | pyruvate      | medium 2 (114)               | 24 +/- 2 °C | no light             | n. t.     | n. t.           | n. t.     | - (not stated) | 114 |
|                        | succinate     | medium 2 (114)               | 24 +/- 2 °C | no light             | n. t.     | n. t.           | n. t.     | - (not stated) | 114 |
|                        | citrate       | medium 2 (114)               | 24 +/- 2 °C | no light             | n. t.     | n. t.           | n. t.     | - (not stated) | 114 |
|                        | lactate       | medium 2 (114)               | 24 +/- 2 °C | no light             | n. t.     | n. t.           | n. t.     | - (not stated) | 114 |
|                        | acetate       | medium 2 (114)               | 24 +/- 2 °C | no light             | n. t.     | n. t.           | n. t.     | - (not stated) | 114 |
|                        | urea          | medium 2 (114)               | 24 +/- 2 °C | no light             | n. t.     | n. t.           | n. t.     | - (not stated) | 114 |
| <i>Nostoc muscorum</i> | glucose       | modified Chu 10 medium (116) | 28 +/- 2°C  | 10 W m <sup>-2</sup> | n. t.     | + (3 mM)        | n. t.     | n. t.          | 115 |
|                        | arginine      | modified Chu 10 medium (116) | 28 +/- 2°C  | 10 W m <sup>-2</sup> | n. t.     | + (50 p. p. m.) | n. t.     | n. t.          | 115 |
|                        | proline       | modified Chu 10 medium (116) | 28 +/- 2°C  | 10 W m <sup>-2</sup> | n. t.     | + (50 p. p. m.) | n. t.     | n. t.          | 115 |
|                        | phenylalanine | modified Chu 10 medium (116) | 28 +/- 2°C  | 10 W m <sup>-2</sup> | n. t.     | + (50 p. p. m.) | n. t.     | n. t.          | 115 |
|                        | leucine       | modified Chu 10 medium (116) | 28 +/- 2°C  | 10 W m <sup>-2</sup> | n. t.     | + (50 p. p. m.) | n. t.     | n. t.          | 115 |
|                        | isoleucine    | modified Chu 10 medium (116) | 28 +/- 2°C  | 10 W m <sup>-2</sup> | n. t.     | + (50 p. p. m.) | n. t.     | n. t.          | 115 |
|                        | lysine        | modified Chu 10 medium (116) | 28 +/- 2°C  | 10 W m <sup>-2</sup> | n. t.     | + (50 p. p. m.) | n. t.     | n. t.          | 115 |
|                        | methionine    | modified Chu 10 medium (116) | 28 +/- 2°C  | 10 W m <sup>-2</sup> | n. t.     | + (50 p. p. m.) | n. t.     | n. t.          | 115 |
|                        | valine        | modified Chu 10 medium (116) | 28 +/- 2°C  | 10 W m <sup>-2</sup> | n. t.     | + (50 p. p. m.) | n. t.     | n. t.          | 115 |
|                        | citrulline    | modified Chu 10 medium (116) | 28 +/- 2°C  | 10 W m <sup>-2</sup> | n. t.     | + (50 p. p. m.) | n. t.     | n. t.          | 115 |
|                        | glutamine     | modified Chu 10 medium (116) | 28 +/- 2°C  | 10 W m <sup>-2</sup> | n. t.     | - (50 p. p. m.) | n. t.     | n. t.          | 115 |
|                        | histidine     | modified Chu 10 medium (116) | 28 +/- 2°C  | 10 W m <sup>-2</sup> | n. t.     | - (50 p. p. m.) | n. t.     | n. t.          | 115 |
|                        | asparagine    | modified Chu 10 medium (116) | 28 +/- 2°C  | 10 W m <sup>-2</sup> | n. t.     | - (50 p. p. m.) | n. t.     | n. t.          | 115 |
|                        | tryptophan    | modified Chu 10 medium (116) | 28 +/- 2°C  | 10 W m <sup>-2</sup> | n. t.     | - (50 p. p. m.) | n. t.     | n. t.          | 115 |
|                        | serine        | modified Chu 10 medium (116) | 28 +/- 2°C  | 10 W m <sup>-2</sup> | n. t.     | - (50 p. p. m.) | n. t.     | n. t.          | 115 |

|                                                                    |               |                                                               |            |                                       |       |                                                                                             |       |                                                                                             |     |
|--------------------------------------------------------------------|---------------|---------------------------------------------------------------|------------|---------------------------------------|-------|---------------------------------------------------------------------------------------------|-------|---------------------------------------------------------------------------------------------|-----|
|                                                                    | aspartic acid | modified Chu 10 medium (116)                                  | 28 +/- 2°C | 10 W m <sup>-2</sup>                  | n. t. | - (50 p. p. m.)                                                                             | n. t. | n. t.                                                                                       | 115 |
|                                                                    | threonine     | modified Chu 10 medium (116)                                  | 28 +/- 2°C | 10 W m <sup>-2</sup>                  | n. t. | - (50 p. p. m.)                                                                             | n. t. | n. t.                                                                                       | 115 |
|                                                                    | glycine       | modified Chu 10 medium (116)                                  | 28 +/- 2°C | 10 W m <sup>-2</sup>                  | n. t. | - (50 p. p. m.)                                                                             | n. t. | n. t.                                                                                       | 115 |
|                                                                    | glutamic acid | modified Chu 10 medium (116)                                  | 28 +/- 2°C | 10 W m <sup>-2</sup>                  | n. t. | toxic (50 p. p. m.)                                                                         | n. t. | n. t.                                                                                       | 115 |
|                                                                    | alanine       | modified Chu 10 medium (116)                                  | 28 +/- 2°C | 10 W m <sup>-2</sup>                  | n. t. | toxic (50 p. p. m.)                                                                         | n. t. | n. t.                                                                                       | 115 |
|                                                                    | tyrosine      | modified Chu 10 medium (116)                                  | 28 +/- 2°C | 10 W m <sup>-2</sup>                  | n. t. | toxic (50 p. p. m.)                                                                         | n. t. | n. t.                                                                                       | 115 |
|                                                                    | cysteine      | modified Chu 10 medium (116)                                  | 28 +/- 2°C | 10 W m <sup>-2</sup>                  | n. t. | toxic (50 p. p. m.)                                                                         | n. t. | n. t.                                                                                       | 115 |
| <i>Nostoc muscorum</i> UTEX 1545 (also <i>Nostoc</i> sp. PCC 6314) | sucrose       | BG11-0 (23)                                                   | 25 °C      | < 500 lx                              | n. t. | +/- (9 mM – 15 mM)                                                                          | n. t. | n. t.                                                                                       | 23  |
|                                                                    | glucose       | BG11-0 (23)                                                   | 25 °C      | < 500 lx                              | n. t. | - (17 – 28 mM)                                                                              | n. t. | n. t.                                                                                       | 23  |
|                                                                    | fructose      | BG11-0 (23)                                                   | 25 °C      | < 500 lx                              | n. t. | - (17 – 28 mM)                                                                              | n. t. | n. t.                                                                                       | 23  |
|                                                                    | ribose        | BG11-0 (23)                                                   | 25 °C      | < 500 lx                              | n. t. | - (33 mM)                                                                                   | n. t. | n. t.                                                                                       | 23  |
| <i>Nostoc punctiforme</i> . ATCC 29133 (PCC 73102)                 | glucose       | BG11-0 (23)                                                   | 25 °C      | < 500 lx                              | n. t. | + (17 – 28 mM)                                                                              | n. t. | n. t.                                                                                       | 23  |
|                                                                    | glucose       | BG11-0 + 2.5 mM NH <sub>4</sub> Cl + 5 mM TES-NaOH (pH 0 7.5) | 30 °C      | 25 μE m <sup>-2</sup> s <sup>-1</sup> | n. t. | n. t.                                                                                       | n. t. | + (5 mM)                                                                                    | 28  |
|                                                                    | fructose      | BG11-0 (23)                                                   | 25 °C      | < 500 lx                              | n. t. | + (17 – 50 mM)                                                                              | n. t. | n. t.                                                                                       | 23  |
|                                                                    | fructose      | buffered medium according to ref S4                           | 28 °C      | 13 W m <sup>-2</sup>                  | n. t. | + (50 mM if 2.5 mM NH <sub>4</sub> Cl and 0.5 g l <sup>-1</sup> casamino acids are coadded) | n. t. | + (50 mM if 2.5 mM NH <sub>4</sub> Cl and 0.5 g l <sup>-1</sup> casamino acids are coadded) | 122 |
|                                                                    | fructose      | BG11-0 + 2.5 mM NH <sub>4</sub> Cl + 5 mM TES-NaOH (pH 0 7.5) | 30 °C      | 25 μE m <sup>-2</sup> s <sup>-1</sup> | n. t. | n. t.                                                                                       | n. t. | + (5 mM)                                                                                    | 28  |
|                                                                    | ribose        | BG11-0 (23)                                                   | 25 °C      | < 500 lx                              | n. t. | + (33 mM)                                                                                   | n. t. | n. t.                                                                                       | 23  |
|                                                                    | sucrose       | BG11-0 (23)                                                   | 25 °C      | < 500 lx                              | n. t. | +/- (9 – 15 mM)                                                                             | n. t. | n. t.                                                                                       | 23  |
| <i>Nostoc punctiforme</i> . ATCC 29133 CSME1A                      | glucose       | BG11-0 + 2.5 mM NH <sub>4</sub> Cl + 5 mM TES-NaOH (pH = 7.5) | 30 °C      | 25 μE m <sup>-2</sup> s <sup>-1</sup> | n. t. | n. t.                                                                                       | n. t. | - (5 mM)                                                                                    | 28  |
|                                                                    | fructose      | BG11-0 + 2.5 mM NH <sub>4</sub> Cl + 5 mM TES-NaOH (pH = 7.5) | 30 °C      | 25 μE m <sup>-2</sup> s <sup>-1</sup> | n. t. | n. t.                                                                                       | n. t. | - (5 mM)                                                                                    | 28  |

|                                                                      |          |                                                                                                                            |          |                                       |           |                 |               |                                                                                             |     |
|----------------------------------------------------------------------|----------|----------------------------------------------------------------------------------------------------------------------------|----------|---------------------------------------|-----------|-----------------|---------------|---------------------------------------------------------------------------------------------|-----|
| <i>Nostoc punctiforme</i> .<br>ATCC 29133 CSME1B                     | glucose  | BG11-0 + 2.5 mM<br>NH <sub>4</sub> Cl + 5 mM<br>TES-NaOH (pH =<br>7.5)                                                     | 30 °C    | 25 µE m <sup>-2</sup> s <sup>-1</sup> | n. t.     | n. t.           | n. t.         | ++ (5 mM)                                                                                   | 28  |
|                                                                      | fructose | BG11-0 + 2.5 mM<br>NH <sub>4</sub> Cl + 5 mM<br>TES-NaOH (pH =<br>7.5)                                                     | 30 °C    | 25 µE m <sup>-2</sup> s <sup>-1</sup> | n. t.     | n. t.           | n. t.         | - (5 mM)                                                                                    | 28  |
| <i>Nostoc punctiforme</i> .<br>ATCC 29133 CSME111                    | glucose  | BG11-0 + 2.5 mM<br>NH <sub>4</sub> Cl + 5 mM<br>TES-NaOH (pH =<br>7.5)                                                     | 30 °C    | 25 µE m <sup>-2</sup> s <sup>-1</sup> | n. t.     | n. t.           | n. t.         | - (5 mM)                                                                                    | 28  |
|                                                                      | fructose | BG11-0 + 2.5 mM<br>NH <sub>4</sub> Cl + 5 mM<br>TES-NaOH (pH =<br>7.5)                                                     | 30 °C    | 25 µE m <sup>-2</sup> s <sup>-1</sup> | n. t.     | n. t.           | n. t.         | +/- (5 mM)                                                                                  | 28  |
| <i>Nostoc</i> sp. MAC                                                | glucose  | Cg 10 medium<br>(S5)                                                                                                       | 37 °C    | 520 ftc (PM)<br>32 ftc (LAHG)         | - (10 mM) | n. t.           | + (10<br>mM)* | + (10 – 50 mM)*<br>* (increased if 200 mg l <sup>-1</sup><br>casamino acids are<br>coadded) | 120 |
|                                                                      | fructose | Cg 10 medium<br>(S5)                                                                                                       | 37 °C    | 520 ftc<br>32 ftc (LAHG)              | - (10 mM) | n. t.           | + (10<br>mM)  | + (10 mM)                                                                                   | 120 |
|                                                                      | sucrose  | Cg 10 medium<br>(S5)                                                                                                       | 37 °C    | 520 ftc<br>32 ftc (LAHG)              | - (10 mM) | n. t.           | n. t.         | + (10 mM)                                                                                   | 120 |
| <i>Nostoc</i> sp. PCC 6302                                           | glucose  | BG11-0 (23)                                                                                                                | 25 °C    | < 500 lx                              | n. t.     | + (17 – 28 mM)  | n. t.         | n. t.                                                                                       | 23  |
|                                                                      | fructose | BG11-0 (23)                                                                                                                | 25 °C    | < 500 lx                              | n. t.     | + (17 – 28 mM)  | n. t.         | n. t.                                                                                       | 23  |
|                                                                      | ribose   | BG11-0 (23)                                                                                                                | 25 °C    | < 500 lx                              | n. t.     | + (33 mM)       | n. t.         | n. t.                                                                                       | 23  |
|                                                                      | sucrose  | BG11-0 (23)                                                                                                                | 25 °C    | < 500 lx                              | n. t.     | + (9 – 15 mM)   | n. t.         | n. t.                                                                                       | 23  |
| <i>Nostoc</i> sp. PCC 6310                                           | glucose  | BG11-0 (23)                                                                                                                | 25 °C    | < 500 lx                              | n. t.     | + (17 – 28 mM)  | n. t.         | n. t.                                                                                       | 23  |
|                                                                      | fructose | BG11-0 (23)                                                                                                                | 25 °C    | < 500 lx                              | n. t.     | + (17 – 28 mM)  | n. t.         | n. t.                                                                                       | 23  |
|                                                                      | ribose   | BG11-0 (23)                                                                                                                | 25 °C    | < 500 lx                              | n. t.     | +/- (33 mM)     | n. t.         | n. t.                                                                                       | 23  |
|                                                                      | sucrose  | BG11-0 (23)                                                                                                                | 25 °C    | < 500 lx                              | n. t.     | + (9 – 15 mM)   | n. t.         | n. t.                                                                                       | 23  |
| <i>Nostoc</i> sp. PCC 6705                                           | sucrose  | BG11-0 (23)                                                                                                                | 25 °C    | < 500 lx                              | n. t.     | +/- (9 – 15 mM) | n. t.         | n. t.                                                                                       | 23  |
|                                                                      | glucose  | BG11-0 (23)                                                                                                                | 25 °C    | < 500 lx                              | n. t.     | - (17 – 28 mM)  | n. t.         | n. t.                                                                                       | 23  |
|                                                                      | fructose | BG11-0 (23)                                                                                                                | 25 °C    | < 500 lx                              | n. t.     | - (17 – 28 mM)  | n. t.         | n. t.                                                                                       | 23  |
|                                                                      | ribose   | BG11-0 (23)                                                                                                                | 25 °C    | < 500 lx                              | n. t.     | - (33 mM)       | n. t.         | n. t.                                                                                       | 23  |
| <i>Nostoc</i> sp. PCC 7107<br>(also <i>Nostoc</i> sp. ATCC<br>29150) | fructose | BG11-0 (23)                                                                                                                | 25 °C    | < 500 lx                              | n. t.     | + (17 – 28 mM)  | n. t.         | n. t.                                                                                       | 23  |
|                                                                      | fructose | <sup>1</sup> / <sub>8</sub> Allen and<br>Arnon's medium<br>(S2) + 2.5 mM<br>NaNO <sub>3</sub> + 2.5 mM<br>KNO <sub>3</sub> | no light | 30 mM                                 | n. t.     | n. t.           | n. t.         | + (1 - 333 mM)                                                                              | 124 |
|                                                                      | glucose  | BG11-0 (23)                                                                                                                | 25 °C    | < 500 lx                              | n. t.     | - (17 – 28 mM)  | n. t.         | n. t.                                                                                       | 23  |
|                                                                      | ribose   | BG11-0 (23)                                                                                                                | 25 °C    | < 500 lx                              | n. t.     | - (33 mM)       | n. t.         | n. t.                                                                                       | 23  |
|                                                                      | sucrose  | BG11-0 (23)                                                                                                                | 25 °C    | < 500 lx                              | n. t.     | - (9 – 15 mM)   | n. t.         | n. t.                                                                                       | 23  |

|                                                              |          |             |       |          |       |                  |       |       |    |
|--------------------------------------------------------------|----------|-------------|-------|----------|-------|------------------|-------|-------|----|
| <i>Nostoc</i> sp. PCC 7416                                   | fructose | BG11-0 (23) | 25 °C | < 500 lx | n. t. | + (17 – 28 mM)   | n. t. | n. t. | 23 |
|                                                              | glucose  | BG11-0 (23) | 25 °C | < 500 lx | n. t. | - (17 – 28 mM)   | n. t. | n. t. | 23 |
|                                                              | ribose   | BG11-0 (23) | 25 °C | < 500 lx | n. t. | - (33 mM)        | n. t. | n. t. | 23 |
|                                                              | sucrose  | BG11-0 (23) | 25 °C | < 500 lx | n. t. | - (9 – 15 mM)    | n. t. | n. t. | 23 |
| <i>Nostoc</i> sp. PCC 7423                                   | fructose | BG11-0 (23) | 25 °C | < 500 lx | n. t. | + (17 – 28 mM)   | n. t. | n. t. | 23 |
|                                                              | glucose  | BG11-0 (23) | 25 °C | < 500 lx | n. t. | - (17 – 28 mM)   | n. t. | n. t. | 23 |
|                                                              | ribose   | BG11-0 (23) | 25 °C | < 500 lx | n. t. | - (33 mM)        | n. t. | n. t. | 23 |
|                                                              | sucrose  | BG11-0 (23) | 25 °C | < 500 lx | n. t. | - (9 – 15 mM)    | n. t. | n. t. | 23 |
| <i>Nostoc</i> sp. PCC 7524                                   | sucrose  | BG11-0 (23) | 25 °C | < 500 lx | n. t. | + (9 – 15 mM)    | n. t. | n. t. | 23 |
|                                                              | glucose  | BG11-0 (23) | 25 °C | < 500 lx | n. t. | - (17 – 28 mM)   | n. t. | n. t. | 23 |
|                                                              | fructose | BG11-0 (23) | 25 °C | < 500 lx | n. t. | - (17 – 28 mM)   | n. t. | n. t. | 23 |
|                                                              | ribose   | BG11-0 (23) | 25 °C | < 500 lx | n. t. | - (33 mM)        | n. t. | n. t. | 23 |
| <i>Oscillatoria williamsii</i> MEV (LPP strain PCC 7105, 23) | glucose  | MN (23)     | 25 °C | < 500 lx | n. t. | +/- (17 – 28 mM) | n. t. | n. t. | 23 |
|                                                              | fructose | MN (23)     | 25 °C | < 500 lx | n. t. | +/- (17 – 28 mM) | n. t. | n. t. | 23 |
|                                                              | sucrose  | MN (23)     | 25 °C | < 500 lx | n. t. | + (9 – 15 mM)    | n. t. | n. t. | 23 |
|                                                              | glycerol | MN (23)     | 25 °C | < 500 lx | n. t. | + (11 mM)        | n. t. | n. t. | 23 |
|                                                              | ribose   | MN (23)     | 25 °C | < 500 lx | n. t. | - (33 mM)        | n. t. | n. t. | 23 |
| <i>Oscillatoria</i> sp. PCC 6407                             | glucose  | BG11 (23)   | 25 °C | < 500 lx | n. t. | +/- (17 – 28 mM) | n. t. | n. t. | 23 |
|                                                              | fructose | BG11-0 (23) | 25 °C | < 500 lx | n. t. | - (17 – 28 mM)   | n. t. | n. t. | 23 |
| <i>Oscillatoria</i> sp. PCC 6412                             | glucose  | BG11 (23)   | 25 °C | < 500 lx | n. t. | +/- (17 – 28 mM) | n. t. | n. t. | 23 |
|                                                              | fructose | BG11 (23)   | 25 °C | < 500 lx | n. t. | +/- (17 – 28 mM) | n. t. | n. t. | 23 |
| <i>Oscillatoria</i> sp. PCC 6506                             | glucose  | BG11 (23)   | 25 °C | < 500 lx | n. t. | +/- (17 – 28 mM) | n. t. | n. t. | 23 |
|                                                              | fructose | BG11-0 (23) | 25 °C | < 500 lx | n. t. | - (17 – 28 mM)   | n. t. | n. t. | 23 |
| <i>Oscillatoria</i> sp. PCC 6602                             | glucose  | BG11 (23)   | 25 °C | < 500 lx | n. t. | + (17 – 28 mM)   | n. t. | n. t. | 23 |
|                                                              | fructose | BG11 (23)   | 25 °C | < 500 lx | n. t. | + (17 – 28 mM)   | n. t. | n. t. | 23 |
| <i>Oscillatoria</i> sp. PCC 7515                             | glucose  | BG11 (23)   | 25 °C | < 500 lx | n. t. | + (17 – 28 mM)   | n. t. | n. t. | 23 |
|                                                              | fructose | BG11 (23)   | 25 °C | < 500 lx | n. t. | + (17 – 28 mM)   | n. t. | n. t. | 23 |
| <i>Phormidium</i> sp. UTEX 1540 (PCC 6409, 23)               | glucose  | BG11 (23)   | 25 °C | < 500 lx | n. t. | + (17 – 28 mM)   | n. t. | n. t. | 23 |
|                                                              | fructose | BG11 (23)   | 25 °C | < 500 lx | n. t. | + (17 – 28 mM)   | n. t. | n. t. | 23 |
|                                                              | ribose   | BG11 (23)   | 25 °C | < 500 lx | n. t. | - (33 mM)        | n. t. | n. t. | 23 |
|                                                              | sucrose  | BG11 (23)   | 25 °C | < 500 lx | n. t. | - (9 – 15 mM)    | n. t. | n. t. | 23 |
|                                                              | glycerol | BG11 (23)   | 25 °C | < 500 lx | n. t. | - (11 mM)        | n. t. | n. t. | 23 |
| <i>Plectonema boryanum</i> UTEX 581 (LPP strain 6306, 23)    | glucose  | BG11 (23)   | 25 °C | < 500 lx | n. t. | + (17 – 28 mM)   | n. t. | n. t. | 23 |
|                                                              | fructose | BG11 (23)   | 25 °C | < 500 lx | n. t. | + (17 – 28 mM)   | n. t. | n. t. | 23 |
|                                                              | ribose   | BG11 (23)   | 25 °C | < 500 lx | n. t. | + (33 mM)        | n. t. | n. t. | 23 |
|                                                              | sucrose  | BG11 (23)   | 25 °C | < 500 lx | n. t. | + (9 – 15 mM)    | n. t. | n. t. | 23 |
|                                                              | glycerol | BG11 (23)   | 25 °C | < 500 lx | n. t. | - (11 mM)        | n. t. | n. t. | 23 |

|                                                                                                |                                   |                                              |       |                                       |             |                |           |           |    |
|------------------------------------------------------------------------------------------------|-----------------------------------|----------------------------------------------|-------|---------------------------------------|-------------|----------------|-----------|-----------|----|
| <i>Plectonema boryanum</i> UTEX 594 ( <i>Leptolyngbya boryana</i> or LPP strain PCC 73110, 23) | ribose                            | modified Chu No 10 medium (S6)               | 33 °C | 1300 lx (PH), 85 lx (LAHG)            | n. t.       | + (10 mM)      | + (10 mM) | + (10 mM) | 85 |
|                                                                                                | ribose                            | BG11 (23)                                    | 25 °C | < 500 lx                              | n. t.       | + (33 mM)      | n. t.     | n. t.     | 23 |
|                                                                                                | sucrose                           | modified Chu No 10 medium (S6)               | 33 °C | no light                              | n. t.       | n. t.          | n. t.     | + (10 mM) | 85 |
|                                                                                                | sucrose                           | BG11 (23)                                    | 25 °C | < 500 lx                              | n. t.       | + (9 – 15 mM)  | n. t.     | n. t.     | 23 |
|                                                                                                | mannitol                          | modified Chu No 10 medium (S6)               | 33 °C | no light                              | n. t.       | n. t.          | n. t.     | + (10 mM) | 85 |
|                                                                                                | maltose                           | modified Chu No 10 medium (S6)               | 33 °C | no light                              | n. t.       | n. t.          | n. t.     | + (10 mM) | 85 |
|                                                                                                | glucose                           | modified Chu No 10 medium (S6);              | 33 °C | no light                              | n. t.       | n. t.          | n. t.     | + (10 mM) | 85 |
|                                                                                                | glucose                           | BG11 (23)                                    | 25 °C | < 500 lx                              | n. t.       | + (17 – 28 mM) | n. t.     | n. t.     | 23 |
|                                                                                                | fructose                          | modified Chu No 10 medium (S6)               | 33 °C | no light                              | n. t.       | n. t.          | n. t.     | + (10 mM) | 85 |
|                                                                                                | fructose                          | BG11 (23)                                    | 25 °C | < 500 lx                              | n. t.       | + (17 – 28 mM) | n. t.     | n. t.     | 23 |
|                                                                                                | casamino acids (only with ribose) | modified Chu No 10 medium (S6)               | 33 °C | 85 lx                                 | n. t.       | n. t.          | + (1 g/l) | + (1 g/l) | 85 |
|                                                                                                | glycerol                          | BG11 (23)                                    | 25 °C | < 500 lx                              | n. t.       | - (11 mM)      | n. t.     | n. t.     | 23 |
| <i>Plectonema boryanum</i> UTEX 594 dg5 (in this paper <i>Leptolyngbya boryanua</i> dg5)       | glucose                           | BG11 buffered with 20 mM HEPES -KOH pH = 8.2 | 30 °C | 50 $\mu\text{E m}^{-2} \text{s}^{-1}$ | +/- (30 mM) | n. t.          | + (30 mM) | + (30 mM) | 71 |
| <i>Plectonema</i> sp. UTEX 1541 (LPP strain PCC 6402, 23)                                      | glucose                           | BG11 (23)                                    | 25 °C | < 500 lx                              | n. t.       | + (17 – 28 mM) | n. t.     | n. t.     | 23 |
|                                                                                                | fructose                          | BG11 (23)                                    | 25 °C | < 500 lx                              | n. t.       | + (17 – 28 mM) | n. t.     | n. t.     | 23 |
|                                                                                                | ribose                            | BG11 (23)                                    | 25 °C | < 500 lx                              | n. t.       | + (33 mM)      | n. t.     | n. t.     | 23 |
|                                                                                                | sucrose                           | BG11 (23)                                    | 25 °C | < 500 lx                              | n. t.       | + (9 – 15 mM)  | n. t.     | n. t.     | 23 |
|                                                                                                | glycerol                          | BG11 (23)                                    | 25 °C | < 500 lx                              | n. t.       | - (11 mM)      | n. t.     | n. t.     | 23 |
| <i>Pleurocapsa</i> sp. PCC 7310                                                                | sucrose                           | ASN-III (23)                                 | 25 °C | < 500 lx                              | n. t.       | + (9 – 15 mM)  | n. t.     | n. t.     | 23 |
|                                                                                                | glucose                           | ASN-III (23)                                 | 25 °C | < 500 lx                              | n. t.       | - (17 – 28 mM) | n. t.     | n. t.     | 23 |
|                                                                                                | fructose                          | ASN-III (23)                                 | 25 °C | < 500 lx                              | n. t.       | - (17 – 28 mM) | n. t.     | n. t.     | 23 |
| <i>Pleurocapsa</i> sp. PCC 7314                                                                | fructose                          | MN (23)                                      | 25 °C | < 500 lx                              | n. t.       | + (17 – 28 mM) | n. t.     | n. t.     | 23 |
|                                                                                                | sucrose                           | MN (23)                                      | 25 °C | < 500 lx                              | n. t.       | + (9 – 15 mM)  | n. t.     | n. t.     | 23 |
|                                                                                                | glucose                           | MN (23)                                      | 25 °C | < 500 lx                              | n. t.       | - (17 – 28 mM) | n. t.     | n. t.     | 23 |

|                                    |           |                                             |             |          |                 |                 |       |                 |     |
|------------------------------------|-----------|---------------------------------------------|-------------|----------|-----------------|-----------------|-------|-----------------|-----|
| <i>Pleurocapsa</i> sp. PCC 7317    | glucose   | MN (23)                                     | 25 °C       | < 500 lx | n. t.           | + (17 – 28 mM)  | n. t. | n. t.           | 23  |
|                                    | fructose  | MN (23)                                     | 25 °C       | < 500 lx | n. t.           | - (17 – 28 mM)  | n. t. | n. t.           | 23  |
|                                    | sucrose   | MN (23)                                     | 25 °C       | < 500 lx | n. t.           | - (9 – 15 mM)   | n. t. | n. t.           | 23  |
| <i>Pleurocapsa</i> sp. PCC 7319    | fructose  | MN (23)                                     | 25 °C       | < 500 lx | n. t.           | + (17 – 28 mM)  | n. t. | n. t.           | 23  |
|                                    | sucrose   | MN (23)                                     | 25 °C       | < 500 lx | n. t.           | + (9 – 15 mM)   | n. t. | n. t.           | 23  |
|                                    | glucose   | MN (23)                                     | 25 °C       | < 500 lx | n. t.           | - (17 – 28 mM)  | n. t. | n. t.           | 23  |
| <i>Pleurocapsa</i> sp. PCC 7320    | glucose   | MN (23)                                     | 25 °C       | < 500 lx | n. t.           | + (17 – 28 mM)  | n. t. | n. t.           | 23  |
|                                    | fructose  | MN (23)                                     | 25 °C       | < 500 lx | n. t.           | + (17 – 28 mM)  | n. t. | n. t.           | 23  |
|                                    | sucrose   | MN (23)                                     | 25 °C       | < 500 lx | n. t.           | + (9 – 15 mM)   | n. t. | n. t.           | 23  |
| <i>Pleurocapsa</i> sp. PCC 7321    | sucrose   | BG11 (23)                                   | 25 °C       | < 500 lx | n. t.           | + (9 – 15 mM)   | n. t. | n. t.           | 23  |
|                                    | glucose   | BG11 (23)                                   | 25 °C       | < 500 lx | n. t.           | - (17 – 28 mM)  | n. t. | n. t.           | 23  |
|                                    | fructose  | BG11 (23)                                   | 25 °C       | < 500 lx | n. t.           | - (17 – 28 mM)  | n. t. | n. t.           | 23  |
| <i>Pleurocapsa</i> sp. PCC 7322    | glucose   | MN (23)                                     | 25 °C       | < 500 lx | n. t.           | + (17 – 28 mM)  | n. t. | n. t.           | 23  |
|                                    | fructose  | MN (23)                                     | 25 °C       | < 500 lx | n. t.           | + (17 – 28 mM)  | n. t. | n. t.           | 23  |
|                                    | sucrose   | MN (23)                                     | 25 °C       | < 500 lx | n. t.           | + (9 – 15 mM)   | n. t. | n. t.           | 23  |
| <i>Pleurocapsa</i> sp. PCC 7327    | sucrose   | BG11 (23)                                   | 37 °C       | < 500 lx | n. t.           | + (9 – 15 mM)   | n. t. | n. t.           | 23  |
|                                    | glucose   | BG11 (23)                                   | 37 °C       | < 500 lx | n. t.           | - (17 – 28 mM)  | n. t. | n. t.           | 23  |
|                                    | fructose  | BG11 (23)                                   | 37 °C       | < 500 lx | n. t.           | - (17 – 28 mM)  | n. t. | n. t.           | 23  |
| <i>Pleurocapsa</i> sp. PCC 7506    | glucose   | MN (23)                                     | 25 °C       | < 500 lx | n. t.           | + (17 – 28 mM)  | n. t. | n. t.           | 23  |
|                                    | fructose  | MN (23)                                     | 25 °C       | < 500 lx | n. t.           | - (17 – 28 mM)  | n. t. | n. t.           | 23  |
|                                    | sucrose   | MN (23)                                     | 25 °C       | < 500 lx | n. t.           | - (9 – 15 mM)   | n. t. | n. t.           | 23  |
| <i>Pleurocapsa</i> sp. PCC 7516    | sucrose   | MN (23)                                     | 25 °C       | < 500 lx | n. t.           | + (9 – 15 mM)   | n. t. | n. t.           | 23  |
|                                    | glucose   | MN (23)                                     | 25 °C       | < 500 lx | n. t.           | - (17 – 28 mM)  | n. t. | n. t.           | 23  |
|                                    | fructose  | MN (23)                                     | 25 °C       | < 500 lx | n. t.           | - (17 – 28 mM)  | n. t. | n. t.           | 23  |
| <i>Scytonema schmidlei</i> De Toni | glucose   | Allen and Arnon's nitrogen-free medium (S2) | 24 +/- 2 °C | 2200 lx  | + (5 – 50 mM)   | + (5 – 50 mM)   | n. t. | + (5 – 50 mM)   | 104 |
|                                    | fructose  | Allen and Arnon's nitrogen-free medium (S2) | 24 +/- 2 °C | 2200 lx  | + (5 – 50 mM)   | + (5 – 50 mM)   | n. t. | + (5 – 50 mM)   | 104 |
|                                    | sucrose   | Allen and Arnon's nitrogen-free medium (S2) | 24 +/- 2 °C | 2200 lx  | + (5 – 50 mM)   | + (5 – 50 mM)   | n. t. | + (5 – 50 mM)   | 104 |
|                                    | galactose | Allen and Arnon's nitrogen-free medium (S2) | 24 +/- 2 °C | 2200 lx  | +/- (5 – 50 mM) | +/- (5 – 50 mM) | n. t. | +/- (5 – 50 mM) | 104 |
|                                    | mannitol  | Allen and Arnon's nitrogen-free medium (S2) | 24 +/- 2 °C | 2200 lx  | +/- (5 – 50 mM) | +/- (5 – 50 mM) | n. t. | +/- (5 – 50 mM) | 104 |



|                                                                                                |                |                                             |             |                                                     |                 |                  |                               |                 |     |
|------------------------------------------------------------------------------------------------|----------------|---------------------------------------------|-------------|-----------------------------------------------------|-----------------|------------------|-------------------------------|-----------------|-----|
|                                                                                                | sorbitol       | Allen and Arnon's nitrogen-free medium (S2) | 24 +/- 2 °C | 2200 lx                                             | +/- (5 – 50 mM) | +/- (5 – 50 mM)  | n. t.                         | +/- (5 – 50 mM) | 104 |
| <i>Scytonema</i> sp. PCC 7110                                                                  | glucose        | BG11-0 (23)                                 | 25 °C       | < 500 lx                                            | n. t.           | + (17 – 28 mM)   | n. t.                         | n. t.           | 23  |
|                                                                                                | fructose       | BG11-0 (23)                                 | 25 °C       | < 500 lx                                            | n. t.           | + (17 – 28 mM)   | n. t.                         | n. t.           | 23  |
|                                                                                                | sucrose        | BG11-0 (23)                                 | 25 °C       | < 500 lx                                            | n. t.           | + (9 – 15 mM)    | n. t.                         | n. t.           | 23  |
| <i>Schizothrix calcicola</i> MAN (LPP strain PCC 7004)                                         | glucose        | BG11 (23)                                   | 25 °C       | < 500 lx                                            | n. t.           | + (17 – 28 mM)   | n. t.                         | n. t.           | 23  |
|                                                                                                | fructose       | BG11 (23)                                   | 25 °C       | < 500 lx                                            | n. t.           | + (17 – 28 mM)   | n. t.                         | n. t.           | 23  |
|                                                                                                | ribose         | BG11 (23)                                   | 25 °C       | < 500 lx                                            | n. t.           | + (33 mM)        | n. t.                         | n. t.           | 23  |
|                                                                                                | sucrose        | BG11 (23)                                   | 25 °C       | < 500 lx                                            | n. t.           | + (9 – 15 mM)    | n. t.                         | n. t.           | 23  |
|                                                                                                | glycerol       | BG11 (23)                                   | 25 °C       | < 500 lx                                            | n. t.           | - (11 mM)        | n. t.                         | n. t.           | 23  |
| <i>Synechococcus</i> sp. PCC 7002 (formerly called <i>Agmenellum quadruplicatum</i> PR-6)      | glucose        | ASP-2 medium (S3) modified by (53)          | 39 °C       | 10 ftc/40 µW cm <sup>2</sup> (LAHG)<br>350 ftc (PM) | - (44 – 55 mM)  | n. t.            | +/- (11 mM)<br>+ (44 – 55 mM) | - (44 – 55 mM)  | 30  |
|                                                                                                | glucose        | BG11 (23)                                   | 25 °C       | < 500 lx                                            | n. t.           | +/- (17 – 28 mM) | n. t.                         | n. t.           | 23  |
|                                                                                                | glucose        | medium A (S7)                               | 38 °C       | not stated                                          | n. t.           | - (10 – 50 mM)   | n. t.                         | n. t.           | 54  |
|                                                                                                | acetate        | ASP-2 medium (S3) modified by (53)          | 39 °C       | 10 ftc/40 µW cm <sup>2</sup> (LAHG)                 | n. t.           | n. t.            | - (12 mM)                     | n. t.           | 30  |
|                                                                                                | glycerol       | BG11 (23)                                   | 25 °C       | < 500 lx                                            | n. t.           | + (11 mM)        | n. t.                         | n. t.           | 23  |
|                                                                                                | glycerol       | medium A (S7)                               | 38 °C       | not stated                                          | +/- (3 – 30 mM) | + (1 – 100 mM)   | n. t.                         | n. t.           | 54  |
|                                                                                                | fructose       | BG11 (23)                                   | 25 °C       | < 500 lx                                            | n. t.           | - (17 – 28 mM)   | n. t.                         | n. t.           | 23  |
|                                                                                                | fructose       | medium A (S7)                               | 38 °C       | not stated                                          | n. t.           | - (10 – 50 mM)   | n. t.                         | n. t.           | 54  |
|                                                                                                | sucrose        | BG11 (23)                                   | 25 °C       | < 500 lx                                            | n. t.           | - (9 – 15 mM)    | n. t.                         | n. t.           | 23  |
|                                                                                                | sodium malate  | medium A (S7)                               | 38 °C       | not stated                                          | n. t.           | - (10 – 50 mM)   | n. t.                         | n. t.           | 54  |
|                                                                                                | sodium citrate | medium A (S7)                               | 38 °C       | not stated                                          | n. t.           | - (10 – 50 mM)   | n. t.                         | n. t.           | 54  |
| <i>Synechococcus</i> sp. PCC 7002 G2 (formerly called <i>Agmenellum quadruplicatum</i> PR-6G2) | glycerol       | not stated                                  | 38 °C       | not stated                                          | - (3 – 30 mM)   | + (1 – 100 mM)   | n. t.                         | n. t.           | 54  |
| <i>Synechococcus</i> sp. PCC 7003                                                              | glucose        | MN (23)                                     | 25 °C       | < 500 lx                                            | n. t.           | +/- (17 – 28 mM) | n. t.                         | n. t.           | 23  |
|                                                                                                | glycerol       | MN (23)                                     | 25 °C       | < 500 lx                                            | n. t.           | + (11 mM)        | n. t.                         | n. t.           | 23  |
|                                                                                                | fructose       | MN (23)                                     | 25 °C       | < 500 lx                                            | n. t.           | - (17 – 28 mM)   | n. t.                         | n. t.           | 23  |
|                                                                                                | sucrose        | MN (23)                                     | 25 °C       | < 500 lx                                            | n. t.           | - (9 – 15 mM)    | n. t.                         | n. t.           | 23  |
| <i>Synechococcus</i> sp. PCC 7335                                                              | fructose       | BG11 (23)                                   | 25 °C       | < 500 lx                                            | n. t.           | + (17 – 28 mM)   | n. t.                         | n. t.           | 23  |
|                                                                                                | glucose        | BG11 (23)                                   | 25 °C       | < 500 lx                                            | n. t.           | - (17 – 28 mM)   | n. t.                         | n. t.           | 23  |
|                                                                                                | sucrose        | BG11 (23)                                   | 25 °C       | < 500 lx                                            | n. t.           | - (9 – 15 mM)    | n. t.                         | n. t.           | 23  |
|                                                                                                | glycerol       | BG11 (23)                                   | 25 °C       | < 500 lx                                            | n. t.           | - (11 mM)        | n. t.                         | n. t.           | 23  |

|                                                               |          |                                           |       |                                                       |                                            |                                                   |       |                        |    |
|---------------------------------------------------------------|----------|-------------------------------------------|-------|-------------------------------------------------------|--------------------------------------------|---------------------------------------------------|-------|------------------------|----|
| <i>Synechococcus</i> sp. PCC 73109                            | glucose  | BG11 (23)                                 | 25 °C | < 500 lx                                              | n. t.                                      | +/- (17 – 28 mM)                                  | n. t. | n. t.                  | 23 |
|                                                               | fructose | BG11 (23)                                 | 25 °C | < 500 lx                                              | n. t.                                      | +/- (17 – 28 mM)                                  | n. t. | n. t.                  | 23 |
|                                                               | glycerol | BG11 (23)                                 | 25 °C | < 500 lx                                              | n. t.                                      | + (11 mM)                                         | n. t. | n. t.                  | 23 |
|                                                               | sucrose  | BG11 (23)                                 | 25 °C | < 500 lx                                              | n. t.                                      | - (9 – 15 mM)                                     | n. t. | n. t.                  | 23 |
| <i>Synechococcus</i> sp. PCC 7511                             | glucose  | BG11 (23)                                 | 25 °C | < 500 lx                                              | n. t.                                      | + (17 – 28 mM)                                    | n. t. | n. t.                  | 23 |
|                                                               | sucrose  | BG11 (23)                                 | 25 °C | < 500 lx                                              | n. t.                                      | + (9 – 15 mM)                                     | n. t. | n. t.                  | 23 |
|                                                               | fructose | BG11 (23)                                 | 25 °C | < 500 lx                                              | n. t.                                      | - (17 – 28 mM)                                    | n. t. | n. t.                  | 23 |
|                                                               | glycerol | BG11 (23)                                 | 25 °C | < 500 lx                                              | n. t.                                      | - (11 mM)                                         | n. t. | n. t.                  | 23 |
| <i>Synechococcus</i> sp. PCC 7942                             | glucose  | BG11 (23)                                 | 30 °C | diurnal light (25 $\mu\text{E m}^{-2}\text{s}^{-1}$ ) | + (28 mM)                                  | n. t.                                             | n. t. | n. t.                  | 60 |
|                                                               | sucrose  | BG11 (23)                                 | 30 °C | diurnal light (25 $\mu\text{E m}^{-2}\text{s}^{-1}$ ) | + (15 mM)                                  | n. t.                                             | n. t. | n. t.                  | 60 |
|                                                               | xylose   | BG11 (23)                                 | 30 °C | diurnal light (25 $\mu\text{E m}^{-2}\text{s}^{-1}$ ) | + (28 mM)                                  | n. t.                                             | n. t. | n. t.                  | 60 |
| <i>Synechococcus</i> sp. PCC 7942 <i>galP</i> <sup>+</sup>    | glucose  | BG11 (23)                                 | 30 °C | diurnal light (25 $\mu\text{E m}^{-2}\text{s}^{-1}$ ) | ++ (28 mM)                                 | n. t.                                             | n. t. | n. t.                  | 60 |
| <i>Synechococcus</i> sp. PCC 7942 <i>Glut1</i> <sup>+</sup>   | glucose  | BG11 (23)                                 | 30 °C | diurnal light (25 $\mu\text{E m}^{-2}\text{s}^{-1}$ ) | - (28 mM)                                  | n. t.                                             | n. t. | n. t.                  | 60 |
| <i>Synechococcus</i> sp. PCC 7942 <i>gtr</i> <sup>+</sup> (P) | glucose  | modified Allen's medium (S8)              | 32 °C | 50 – 60 $\mu\text{E m}^{-2}\text{s}^{-1}$ (3000 lx)   | n. t.                                      | + (56 mM), plasmid could not be maintained stably | n. t. | n. t.                  | 39 |
| <i>Synechococcus</i> sp. PCC 7942 <i>gtr</i> <sup>+</sup> (C) | glucose  | modified Allen's medium (S8)              | 32 °C | 50 – 60 $\mu\text{E m}^{-2}\text{s}^{-1}$ (3000 lx)   | toxic (56 mM)                              | toxic (56 mM)                                     | n. t. | n. t.                  | 39 |
|                                                               | glucose  | BG11 (23)                                 | 30 °C | diurnal light (25 $\mu\text{E m}^{-2}\text{s}^{-1}$ ) | + (28 mM) (until 12 h), toxic (after 12 h) | n. t.                                             | n. t. | n. t.                  | 60 |
| <i>Synechococcus</i> sp. PCC 7942 <i>cscKB</i> <sup>+</sup>   | sucrose  | BG11 (23)                                 | 30 °C | diurnal light (25 $\mu\text{E m}^{-2}\text{s}^{-1}$ ) | ++ (15 mM)                                 | n. t.                                             | n. t. | n. t.                  | 60 |
| <i>Synechococcus</i> sp. PCC 7942 <i>xyIE</i> <sup>+</sup>    | xylose   | BG11 (23)                                 | 30 °C | diurnal light (25 $\mu\text{E m}^{-2}\text{s}^{-1}$ ) | - (28 mM)                                  | n. t.                                             | n. t. | n. t.                  | 60 |
| <i>Synechococcus</i> sp. PCC 7942 <i>xyEAB</i> <sup>+</sup>   | xylose   | BG11 (23)                                 | 30 °C | diurnal light (25 $\mu\text{E m}^{-2}\text{s}^{-1}$ ) | ++ (28 mM)                                 | n. t.                                             | n. t. | n. t.                  | 60 |
| <i>Synechococcus</i> sp. PCC 7942 <i>glf</i> <sup>+</sup>     | glucose  | BG11 (23)                                 | 30 °C | no light                                              | n. t.                                      | n. t.                                             | n. t. | + (500 $\mu\text{M}$ ) | 58 |
|                                                               | fructose | BG11 (23)                                 | 30 °C | no light                                              | n. t.                                      | n. t.                                             | n. t. | + (500 $\mu\text{M}$ ) | 58 |
| <i>Synechocystis</i> sp. PCC 6702                             | glucose  | BG11 (23)                                 | 25 °C | < 500 lx                                              | n. t.                                      | + (17 – 28 mM)                                    | n. t. | n. t.                  | 23 |
|                                                               | sucrose  | BG11 (23)                                 | 25 °C | < 500 lx                                              | n. t.                                      | - (9 – 15 mM)                                     | n. t. | n. t.                  | 23 |
|                                                               | glycerol | BG11 (23)                                 | 25 °C | < 500 lx                                              | n. t.                                      | - (11 mM)                                         | n. t. | n. t.                  | 23 |
| <i>Synechocystis</i> sp. PCC 6714                             | glucose  | BG11 (23)                                 | 25 °C | < 500 lx                                              | n. t.                                      | + (17 – 28 mM)                                    | n. t. | n. t.                  | 23 |
|                                                               | glucose  | Allen's medium with 2x nitrate conc. (S9) | 34 °C | 70 $\mu\text{E m}^{-2}\text{s}^{-1}$ (3500 lx)        | n. t.                                      | + (56 mM)                                         | n. t. | + (56 mM)              | 64 |
|                                                               | sucrose  | BG11 (23)                                 | 25 °C | < 500 lx                                              | n. t.                                      | - (9 – 15 mM)                                     | n. t. | n. t.                  | 23 |
|                                                               | glycerol | BG11 (23)                                 | 25 °C | < 500 lx                                              | n. t.                                      | - (11 mM)                                         | n. t. | n. t.                  | 23 |

|                                                                                                                                    |          |                                                  |             |                                                              |                                                                                 |                 |               |                                                         |    |
|------------------------------------------------------------------------------------------------------------------------------------|----------|--------------------------------------------------|-------------|--------------------------------------------------------------|---------------------------------------------------------------------------------|-----------------|---------------|---------------------------------------------------------|----|
| <i>Synechocystis</i> sp. PCC 6803                                                                                                  | glucose  | BG11 (23)                                        | 25 °C       | < 500 lx                                                     | n. t.                                                                           | + (17 – 28 mM)  | n. t.         | n. t.                                                   | 23 |
|                                                                                                                                    | glucose  | BG11 (23)                                        | 30 °C       | not stated                                                   | -/slightly toxic (10 mM) (a glucose tolerant variant has been isolated by (69)) | + (10 mM)       | n. t.         | n. t.                                                   | 68 |
| (tolerant variant of <i>Synechocystis</i> sp. PCC 6803 (69))                                                                       | glucose  | BG11 (23) + 5 mM TES pH = 8.0                    | 31 +/- 2 °C | 40 $\mu\text{mol m}^{-2} \text{s}^{-1}$                      | n. t.                                                                           | n. t.           | + (5 mM)      | - (5 mM)                                                | 29 |
| (tolerant variant of <i>Synechocystis</i> sp. PCC 6803 (69))                                                                       | glucose  | BG11 (23) + 6 mM HEPES according to ref 65       | 31 +/- 2 °C | 40 $\mu\text{mol m}^{-2} \text{s}^{-1}$                      | n. t.                                                                           | n. t.           | + (56 mM)     | +/- (56 mM) (only for the first 6 days, then declining) | 29 |
|                                                                                                                                    | sucrose  | BG11 (23)                                        | 25 °C       | < 500 lx                                                     | n. t.                                                                           | - (9 – 15 mM)   | n. t.         | n. t.                                                   | 23 |
|                                                                                                                                    | glycerol | BG11 (23)                                        | 25 °C       | < 500 lx                                                     | n. t.                                                                           | - (11 mM)       | n. t.         | n. t.                                                   | 23 |
|                                                                                                                                    | fructose | BG11 (23)                                        | 30 °C       | not stated                                                   | toxic (10 mM)                                                                   | n. t.           | n. t.         | n. t.                                                   | 68 |
|                                                                                                                                    | xylose   | BG11 (23)                                        | 30 °C       | 50 $\mu\text{E m}^{-2} \text{s}^{-1}$ for 1 h per day (LAHG) | n. t.                                                                           | n. t.           | - (5 – 50 mM) | n. t.                                                   | 63 |
| <i>Synechocystis</i> sp. PCC 6803 <i>gtr</i> <sup>-</sup>                                                                          | glucose  | BG11 (23)                                        | 30 °C       | not stated                                                   | not toxic (10 mM)                                                               | - (10 mM)       | n. t.         | n. t.                                                   | 68 |
|                                                                                                                                    | fructose | BG11 (23)                                        | 30 °C       | not stated                                                   | not toxic (10 mM)                                                               | n. t.           | n. t.         | n. t.                                                   | 68 |
|                                                                                                                                    | fructose | BG11 (23)                                        | 32 °C       | 10 $\mu\text{E m}^{-2} \text{s}^{-1}$                        | + (50 – 200 mM)                                                                 | + (50 – 200 mM) | -             | -                                                       | 74 |
| <i>Synechocystis</i> sp. PCC 6803 <i>psbA</i> <sup>-</sup> (of glucose tolerant variant of <i>Synechocystis</i> sp. PCC 6803 (69)) | glucose  | BG11 (23) + 5 mM TES pH = 8.0                    | 31 +/- 2 °C | 40 $\mu\text{mol m}^{-2} \text{s}^{-1}$                      | n. t.                                                                           | n. t.           | + (5 mM)      | n. t.                                                   | 29 |
| <i>Synechocystis</i> sp. PCC 6803 <i>coxBAC</i> <sup>-</sup>                                                                       | glucose  | BG11 (23)                                        | 32 °C       | 40 $\mu\text{E m}^{-2} \text{s}^{-1}$                        | n. t.                                                                           | + (10 mM)       | - (10 mM)     | n. t.                                                   | 70 |
| <i>Synechocystis</i> sp. PCC 6803 <i>cytM</i>                                                                                      | glucose  | BG11 (23) buffered with 20 mM HEPES-KOH pH = 8.2 | 30 °C       | 50 $\mu\text{E m}^{-2} \text{s}^{-1}$                        | + (5 mM)                                                                        | n. t.           | + (5 mM)      | + (5 mM)                                                | 71 |
| <i>Synechocystis</i> sp. PCC 6803 <i>xylAB</i> <sup>+</sup>                                                                        | glucose  | BG11 (23)                                        | 30 °C       | 50 $\mu\text{E m}^{-2} \text{s}^{-1}$ for 1h per day (LAHG)  | n. t.                                                                           | n. t.           | + (5.6 mM)    | n. t.                                                   | 63 |
|                                                                                                                                    | xylose   | BG11 (23)                                        | 30 °C       | 50 $\mu\text{E m}^{-2} \text{s}^{-1}$ for 1h per day (LAHG)  | n. t.                                                                           | n. t.           | - (5 – 50 mM) | n. t.                                                   | 63 |
| <i>Synechocystis</i> sp. PCC 6805                                                                                                  | glucose  | BG11 (23)                                        | 25 °C       | < 500 lx                                                     | n. t.                                                                           | + (17 – 28 mM)  | n. t.         | n. t.                                                   | 23 |
|                                                                                                                                    | sucrose  | BG11 (23)                                        | 25 °C       | < 500 lx                                                     | n. t.                                                                           | - (9 – 15 mM)   | n. t.         | n. t.                                                   | 23 |
|                                                                                                                                    | glycerol | BG11 (23)                                        | 25 °C       | < 500 lx                                                     | n. t.                                                                           | - (11 mM)       | n. t.         | n. t.                                                   | 23 |
| <i>Synechocystis</i> sp. PCC 6806                                                                                                  | glucose  | BG11 (23)                                        | 25 °C       | < 500 lx                                                     | n. t.                                                                           | + (17 – 28 mM)  | n. t.         | n. t.                                                   | 23 |
|                                                                                                                                    | sucrose  | BG11 (23)                                        | 25 °C       | < 500 lx                                                     | n. t.                                                                           | - (9 – 15 mM)   | n. t.         | n. t.                                                   | 23 |
|                                                                                                                                    | glycerol | BG11 (23)                                        | 25 °C       | < 500 lx                                                     | n. t.                                                                           | - (11 mM)       | n. t.         | n. t.                                                   | 23 |

|                                      |                |                               |            |                                       |                                        |                  |                                                                               |             |     |
|--------------------------------------|----------------|-------------------------------|------------|---------------------------------------|----------------------------------------|------------------|-------------------------------------------------------------------------------|-------------|-----|
| <i>Synechocystis</i> sp. PCC 6905    | glucose        | BG11 (23)                     | 25 °C      | < 500 lx                              | n. t.                                  | + (17 – 28 mM)   | n. t.                                                                         | n. t.       | 23  |
|                                      | sucrose        | BG11 (23)                     | 25 °C      | < 500 lx                              | n. t.                                  | - (9 – 15 mM)    | n. t.                                                                         | n. t.       | 23  |
|                                      | glycerol       | BG11 (23)                     | 25 °C      | < 500 lx                              | n. t.                                  | - (11 mM)        | n. t.                                                                         | n. t.       | 23  |
| <i>Synechocystis</i> sp. PCC 6906    | glucose        | BG11 (23)                     | 25 °C      | < 500 lx                              | n. t.                                  | +/- (17 – 28 mM) | n. t.                                                                         | n. t.       | 23  |
|                                      | glycerol       | BG11 (23)                     | 25 °C      | < 500 lx                              | n. t.                                  | + (11 mM)        | n. t.                                                                         | n. t.       | 23  |
|                                      | sucrose        | BG11 (23)                     | 25 °C      | < 500 lx                              | n. t.                                  | - (9 – 15 mM)    | n. t.                                                                         | n. t.       | 23  |
| <i>Synechocystis</i> sp. PCC 7201    | glucose        | BG11 (23)                     | 25 °C      | < 500 lx                              | n. t.                                  | + (17 – 28 mM)   | n. t.                                                                         | n. t.       | 23  |
|                                      | sucrose        | BG11 (23)                     | 25 °C      | < 500 lx                              | n. t.                                  | - (9 – 15 mM)    | n. t.                                                                         | n. t.       | 23  |
|                                      | glycerol       | BG11 (23)                     | 25 °C      | < 500 lx                              | n. t.                                  | - (11 mM)        | n. t.                                                                         | n. t.       | 23  |
| <i>Synechocystis</i> sp. PCC 7509    | glucose        | BG11 (23)                     | 25 °C      | < 500 lx                              | n. t.                                  | + (17 – 28 mM)   | n. t.                                                                         | n. t.       | 23  |
|                                      | sucrose        | BG11 (23)                     | 25 °C      | < 500 lx                              | n. t.                                  | + (9 – 15 mM)    | n. t.                                                                         | n. t.       | 23  |
|                                      | glycerol       | BG11 (23)                     | 25 °C      | < 500 lx                              | n. t.                                  | - (11 mM)        | n. t.                                                                         | n. t.       | 23  |
| <i>Thermosynechococcus elongatus</i> | glucose        | BG11 (23)                     | 48 °C      | 20 $\mu\text{E m}^{-2} \text{s}^{-1}$ | + (50 mM)                              | + (50 mM)        | n. t.                                                                         | n. t.       | 79  |
|                                      | fructose       | BG11 (23)                     | 48 °C      | 20 $\mu\text{E m}^{-2} \text{s}^{-1}$ | + (50 mM)                              | + (50 mM)        | + (50 mM),<br>15 min<br>25 $\mu\text{E m}^{-2} \text{s}^{-1}$<br>illumination | + (50 mM)   | 79  |
|                                      | galactose      | BG11 (23)                     | 48 °C      | 20 $\mu\text{E m}^{-2} \text{s}^{-1}$ | + (50 mM)                              | + (50 mM)        | n. t.                                                                         | n. t.       | 79  |
|                                      | lactose        | BG11 (23)                     | 48 °C      | 20 $\mu\text{E m}^{-2} \text{s}^{-1}$ | + (35 mM)                              | + (35 mM)        | n. t.                                                                         | n. t.       | 79  |
|                                      | sucrose        | BG11 (23)                     | 48 °C      | 20 $\mu\text{E m}^{-2} \text{s}^{-1}$ | + (35 mM)                              | + (35 mM)        | n. t.                                                                         | n. t.       | 79  |
|                                      | arabinose      | BG11 (23)                     | 48 °C      | 20 $\mu\text{E m}^{-2} \text{s}^{-1}$ | - (75 mM)                              | - (75 mM)        | n. t.                                                                         | n. t.       | 79  |
|                                      | maltose        | BG11 (23)                     | 48 °C      | 20 $\mu\text{E m}^{-2} \text{s}^{-1}$ | - (35 mM)                              | - (35 mM)        | n. t.                                                                         | n. t.       | 79  |
|                                      | trehalose      | BG11 (23)                     | 48 °C      | 20 $\mu\text{E m}^{-2} \text{s}^{-1}$ | - (35 mM)                              | - (35 mM)        | n. t.                                                                         | n. t.       | 79  |
|                                      | xylose         | BG11 (23)                     | 48 °C      | 20 $\mu\text{E m}^{-2} \text{s}^{-1}$ | inhibitory (75 mM)                     | - (75 mM)        | n. t.                                                                         | n. t.       | 79  |
| <i>Westiellopsis prolifica</i>       | fructose       | Allen and Arnon medium (S2)   | 28 +/- 2°C | 2200 lx                               | ++ (11 mM)                             | n. t.            | n. t.                                                                         | ++ (11 mM)  | 128 |
|                                      | lactose        | Allen and Arnon's medium (S2) | 28 +/- 2°C | 2200 lx                               | ++ (5.8 mM)                            | n. t.            | n. t.                                                                         | ++ (5.8 mM) | 128 |
|                                      | sucrose        | Allen and Arnon's medium (S2) | 28 +/- 2°C | 2200 lx                               | ++ (5.5 mM)                            | n. t.            | n. t.                                                                         | ++ (5.8 mM) | 128 |
|                                      | sorbose        | Allen and Arnon's medium (S2) | 28 +/- 2°C | 2200 lx                               | + (11 mM)                              | n. t.            | n. t.                                                                         | ++ (11 mM)  | 128 |
|                                      | galactose      | Allen and Arnon's medium (S2) | 28 +/- 2°C | 2200 lx                               | + (11 mM) (only for the first 15 days) | n. t.            | n. t.                                                                         | ++ (11 mM)  | 128 |
|                                      | glucose        | Allen and Arnon's medium (S2) | 28 +/- 2°C | 2200 lx                               | + (11 mM)                              | n. t.            | n. t.                                                                         | ++ (11 mM)  | 128 |
|                                      | sodium acetate | Allen and Arnon's medium (S2) | 28 +/- 2°C | 2200 lx                               | + (24 mM) (only for the first 10 days) | n. t.            | n. t.                                                                         | ++ (24 mM)  | 128 |

|                                |                           |                               |            |          |                                        |                |       |            |     |
|--------------------------------|---------------------------|-------------------------------|------------|----------|----------------------------------------|----------------|-------|------------|-----|
|                                | mannitol                  | Allen and Arnon's medium (S2) | 28 +/- 2°C | 2200 lx  | + (11 mM)                              | n. t.          | n. t. | ++ (11 mM) | 128 |
|                                | sorbitol                  | Allen and Arnon's medium (S2) | 28 +/- 2°C | 2200 lx  | + (11 mM)                              | n. t.          | n. t. | ++ (11 mM) | 128 |
|                                | glycerol                  | Allen and Arnon's medium (S2) | 28 +/- 2°C | 2200 lx  | + (22 mM) (only for the first 10 days) | n. t.          | n. t. | + (22 mM)  | 128 |
|                                | mannose                   | Allen and Arnon's medium (S2) | 28 +/- 2°C | 2200 lx  | inhibitory (11 mM)                     | n. t.          | n. t. | + (11 mM)  | 128 |
|                                | xylose                    | Allen and Arnon's medium (S2) | 28 +/- 2°C | 2200 lx  | inhibitory (11 mM)                     | n. t.          | n. t. | + (11 mM)  | 128 |
|                                | acetic acid               | Allen and Arnon's medium (S2) | 28 +/- 2°C | 2200 lx  | inhibitory (33 mM)                     | n. t.          | n. t. | - (33 mM)  | 128 |
|                                | propionic acid            | Allen and Arnon's medium (S2) | 28 +/- 2°C | 2200 lx  | inhibitory (27 mM)                     | n. t.          | n. t. | - (27 mM)  | 128 |
|                                | fructose 1,6-bisphosphate | Allen and Arnon's medium (S2) | 28 +/- 2°C | 2200 lx  | inhibitory (6 mM)                      | n. t.          | n. t. | + (6 mM)   | 128 |
|                                | pyruvic acid              | Allen and Arnon's medium (S2) | 28 +/- 2°C | 2200 lx  | Inhibitory (23 mM)                     | n. t.          | n. t. | - (23 mM)  | 128 |
|                                | dihydroxy acetone         | Allen and Arnon's medium (S2) | 28 +/- 2°C | 2200 lx  | Inhibitory (22 mM)                     | n. t.          | n. t. | + (22 mM)  | 128 |
|                                | succinic acid             | Allen and Arnon's medium (S2) | 28 +/- 2°C | 2200 lx  | Inhibitory (17 mM)                     | n. t.          | n. t. | + (17 mM)  | 128 |
| <i>Xenococcus</i> sp. PCC 7307 | glucose                   | MN (23)                       | 25 °C      | < 500 lx | n. t.                                  | + (17 – 28 mM) | n. t. | n. t.      | 23  |
|                                | sucrose                   | MN (23)                       | 25 °C      | < 500 lx | n. t.                                  | + (9 – 15 mM)  | n. t. | n. t.      | 23  |
|                                | fructose                  | MN (23)                       | 25 °C      | < 500 lx | n. t.                                  | - (17 – 28 mM) | n. t. | n. t.      | 23  |

## References

- S1. Fogg, G. E. Growth and heterocyst production in *Anabaena cylindrica* Lemm. II. In relation to carbon and nitrogen metabolism. *Ann. Bot.* **1949**, *13*, 241-259, DOI: 10.1038/220810b0
- S2. Allen, M. B.; Arnon, D. I. Studies on nitrogen-fixing blue-green algae. I. Growth and nitrogen fixation by *Anabaena cylindrica* Lemm. *Plant Physiol.* **1955**, *30*, 366-372, DOI: 10.1104/pp.30.4.366

- S3. Provasoli, L.; McLaughlin, J. J.; Droop, M. R. The development of artificial media for marine algae. *Arch. Mikrobiol.* **1957**, *25*, 392-428.  
DOI: 10.1007/BF00446694
- S4. Cohen, M. F.; Wallis, J. G.; Campbell, E. L.; Meeks, J. C. Transposon mutagenesis of *Nostoc* sp. strain ATCC 29133, a filamentous cyanobacterium with multiple cellular differentiation alternatives. *Microbiology (Reading)* **1994**, *140*, 3233-3240, DOI:  
10.1099/13500872-140-12-3233
- S5. Van Baalen, C. Further observations on growth of single cells of coccoid blue-green algae. *J. Phycol.* **1967**, *3*, 154-157, DOI:  
10.1111/j.1529-8817.1967.tb04650.x
- S6. Safferman, R. S.; Morris, M. E. Observations on the occurrence, distribution, and seasonal incidence of blue-green algal viruses. *Appl. Microbiol.* 1967, *15*, 1210-1222, DOI: 10.1128/am.15.5.1219-1222.1967
- S7. Stevens, S. E. Jr.; Patterson, C. O. P.; Myers, J. The production of hydrogen peroxide by blue-green algae: a survey. *J. Phycol.* **1973**, *9*, 427-430, DOI: 10.1128/jb.165.2.654-656.1986
- S8. Panoff, J. M.; Priem, B.; Morvan, H.; Joset, F. Sulphated exopolysaccharides produced by two unicellular strains of cyanobacteria, *Synechocystis* PCC 6803 and 6714. *Arch. Microbiol.* **1988**, *150*, 558-563, DOI: 10.1007/BF00408249
- S9. Joset-Espardellier, F.; Astier, C.; Evan, E. H.; Carr, N. G. Cyanobacteria grown under photoautotrophic, photoheterotrophic and heterotrophic regimes: sugar metabolism and carbon dioxide fixation. *FEMS Microbiol. Lett.* **1978**, *4*, 261-264, DOI: 10.1111/j.1574-6968.1978.tb02875.x
